# Supplementary material for: Ancient polymorphisms contribute to genome-wide variation by long-term balancing selection and divergent sorting in Boechera stricta
Source: PubMed Central journal article supplement (PMC6587263; doi:10.1186/s13059-019-1729-9), 2019-06-21
Supplement: 13059_2019_1729_MOESM1_ESM.pdf [file 13059_2019_1729_MOESM1_ESM.pdf]

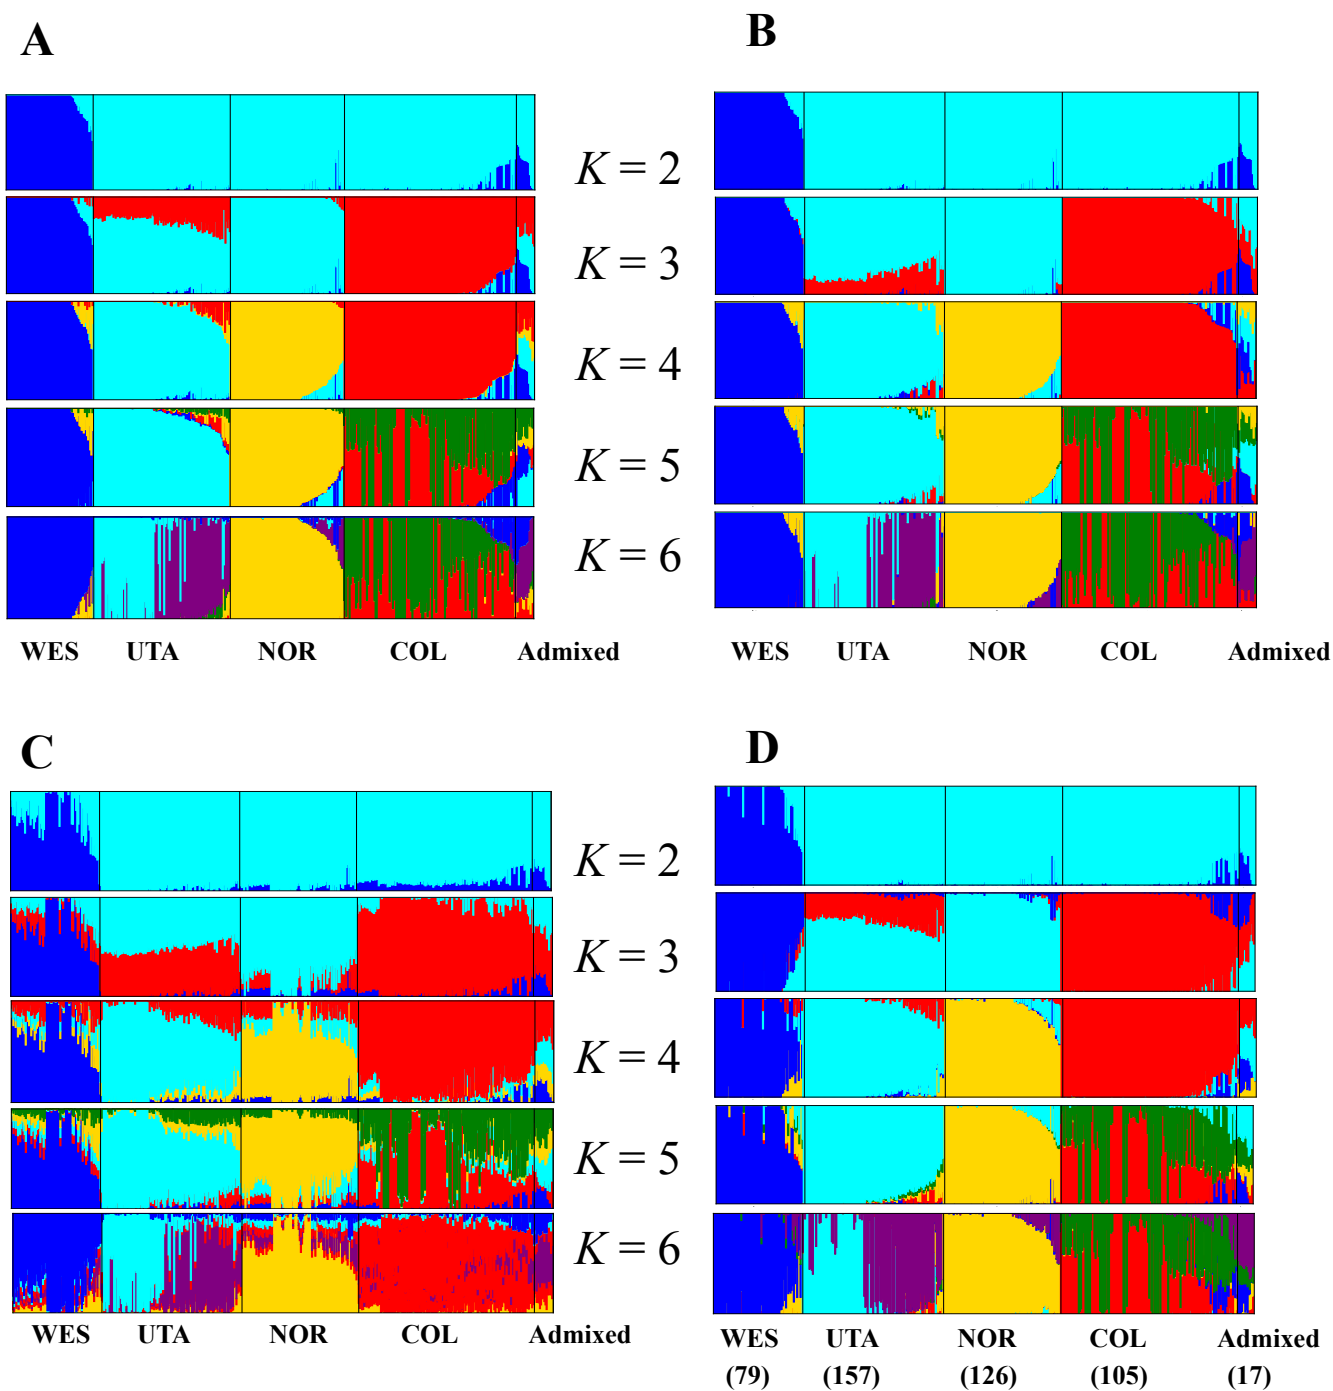

**Fig. S1. Admixture (A), FastSTRUCTURE (B), sNMF (C) and NGSadmix (D) analyses from  $K=2-6$  on SNP data for 484 accessions of *B. stricta*. Each vertical bar represents an individual, with different colors representing one of the genetic ancestries. The number of individuals in each lineage is shown in D.**

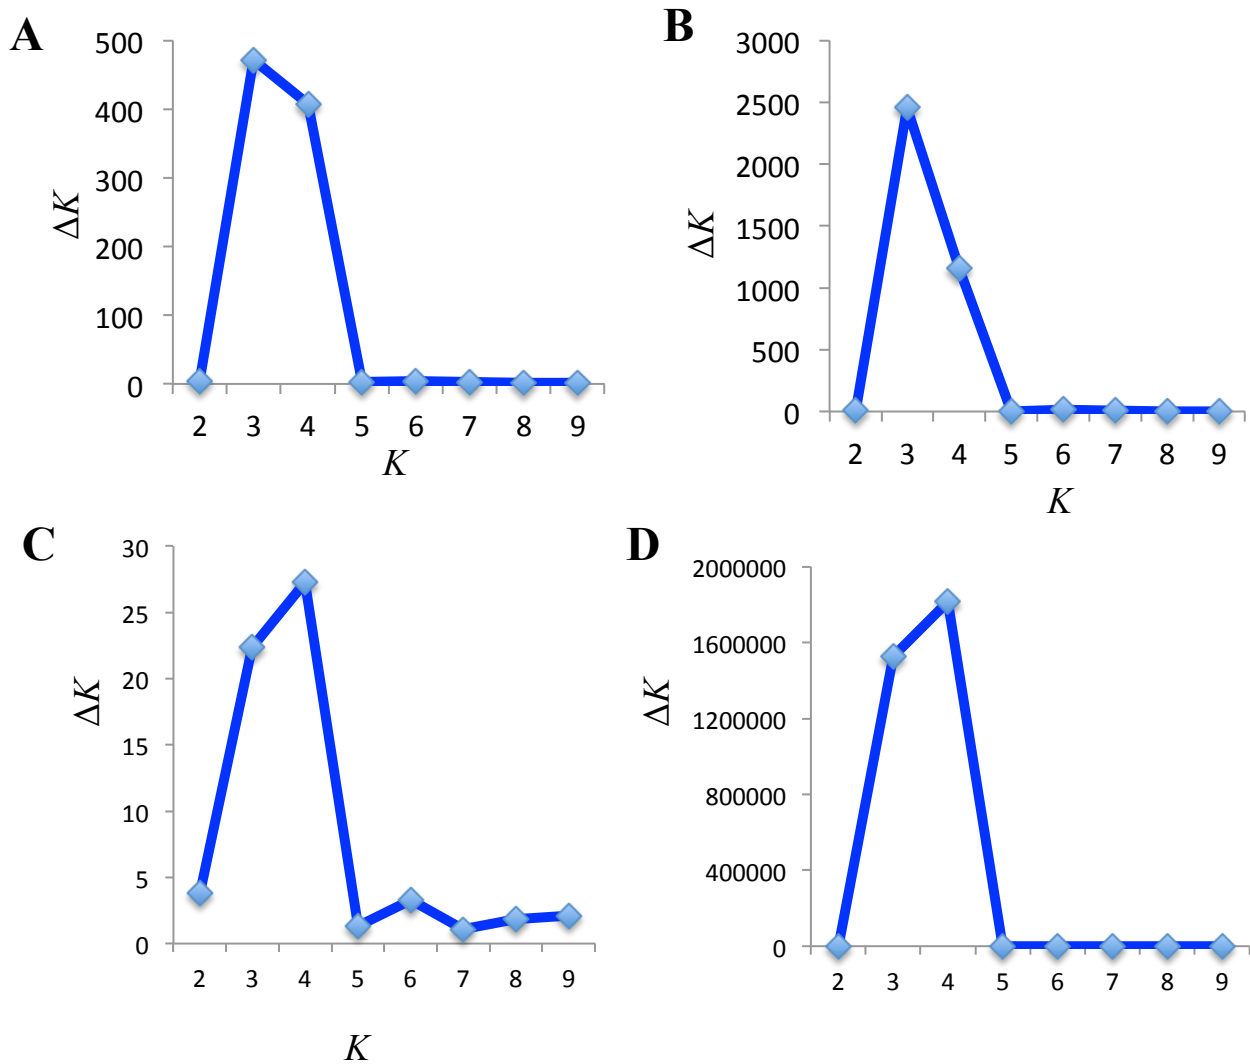

**Fig. S2. Detection of the best grouping number ( $K$ ) for the Admixture (A), FastSTRUCTURE (B), sNMF (C) and NGSadmix (D) analyses.**  $\Delta K$  values were estimated from Cross-Validation (CV) error in Admixture, marginal likelihood in FastSTRUCTURE (B), Cross-Entropy (CE) criterion in sNMF, and best likelihood in NGSadmix (D). The  $\Delta K$  method evaluates the rate of change of the likelihood (or CV error, CE criterion) function between successive  $K$  values and identifies the optimal number of clusters as the one giving highest value of  $\Delta K$ . Following this method, we found  $K = 3$  and  $K = 4$  to be best choices for the number of putative clusters of the 484 individuals.

**Model 1**

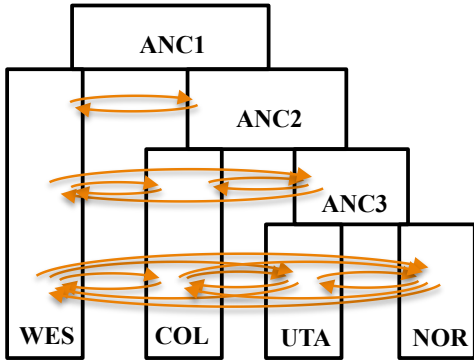

**Model 2**

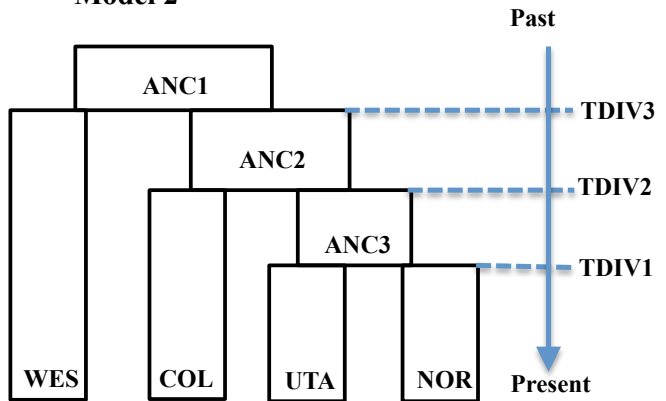

**Model 3**

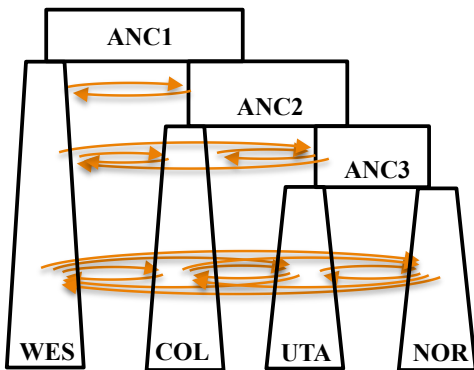

**Model 4**

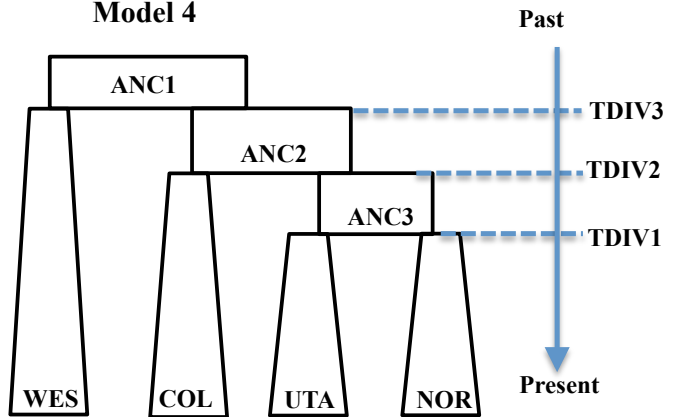

**Model 5**

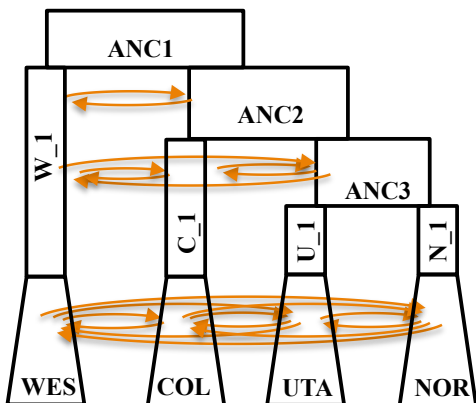

**Model 6**

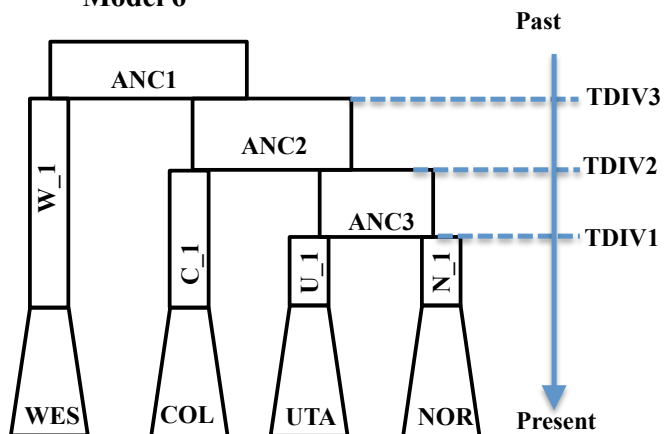

**Model 7**

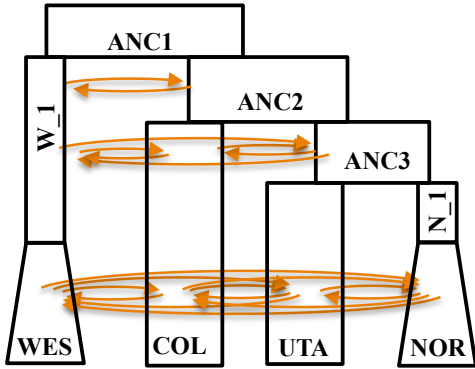

**Model 8**

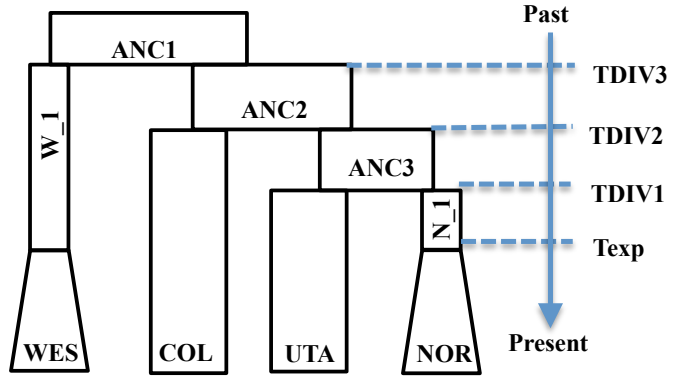

**Model 9**

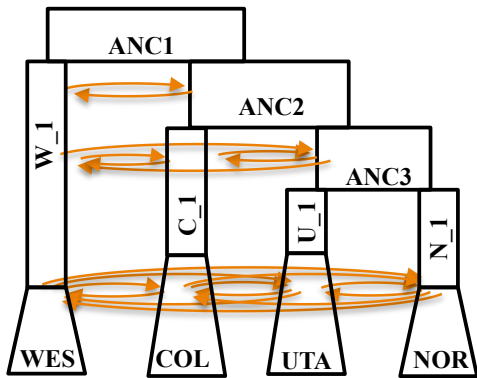

**Model 10**

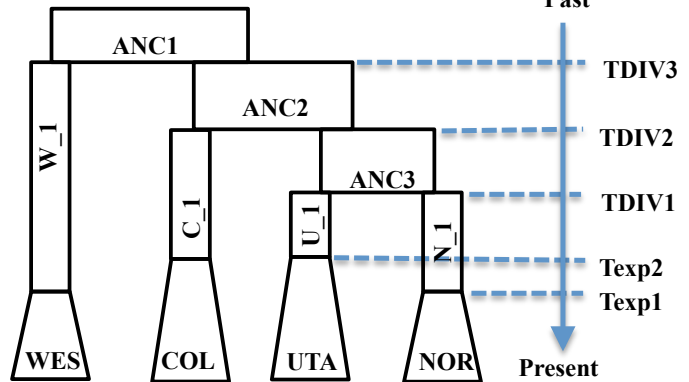

**Model 11**

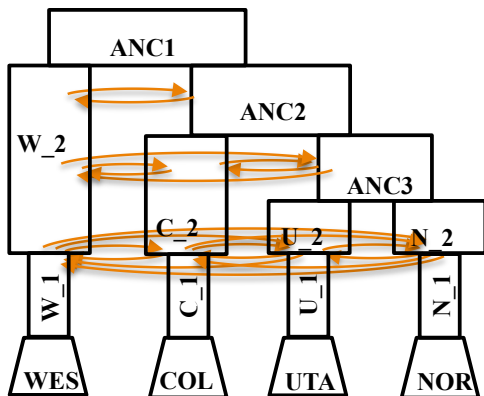

**Model 12**

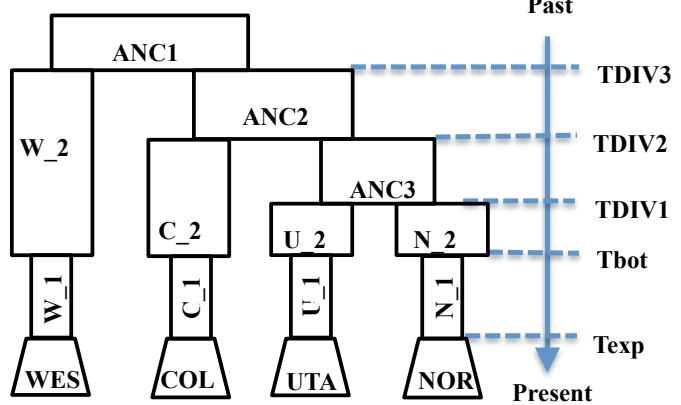

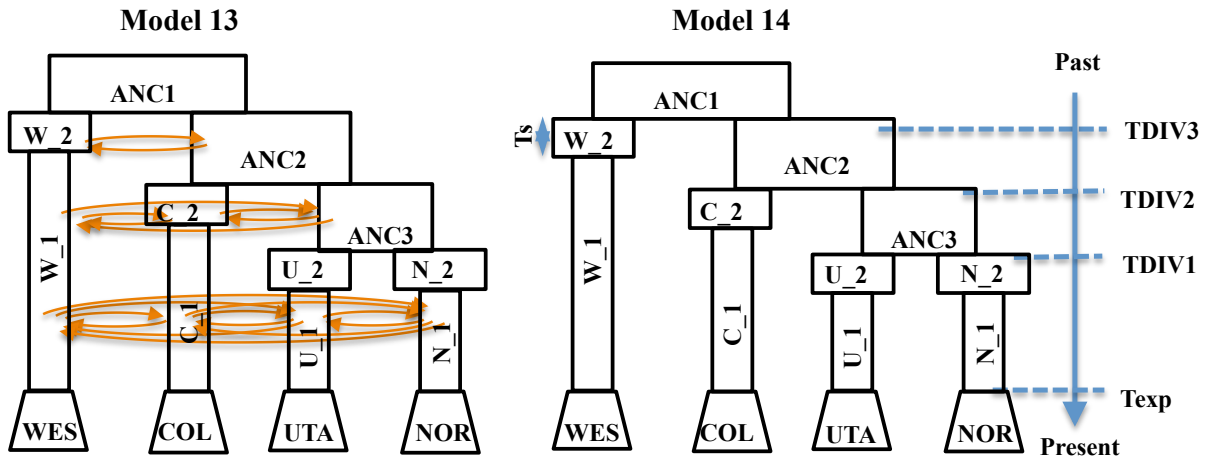

**Fig. S3. Fourteen models for isolation-with-gene-flow (Nos. 1, 3, 5, 7, 9, 11 and 13) and isolation-without-gene-flow (Nos. 2, 4, 6, 8, 10, 12 and 14).** In models 1 and 2, all groups have constant population sizes after splitting. Models 3 and 4, all groups experienced exponential population size change after splitting. Models 5 and 6, all groups expanded exponentially at a recent time after splitting of group NOR. Models 7 and 8, groups NOR and WES expanded exponentially at a recent time after splitting of group NOR. Groups COL and UTA have constant population sizes after splitting. Models 9 and 10, groups expanded exponentially at different times after splitting of group NOR. Groups UTA and COL expanded earlier than groups NOR and UTA. Models 11 and 12, all groups experienced two steps of population size changes, an instantaneous size change at time  $T_{bot}$  and an exponential size change initiated at time  $T_{exp}$ . Model 13 and 14, each group experienced a population size change after splitting, within a short period less than 100 generations ( $T_s$ ).  $T_s$  is the same for all groups. Afterwards, all groups experienced a population expansion initiated at time  $T_{exp}$ .

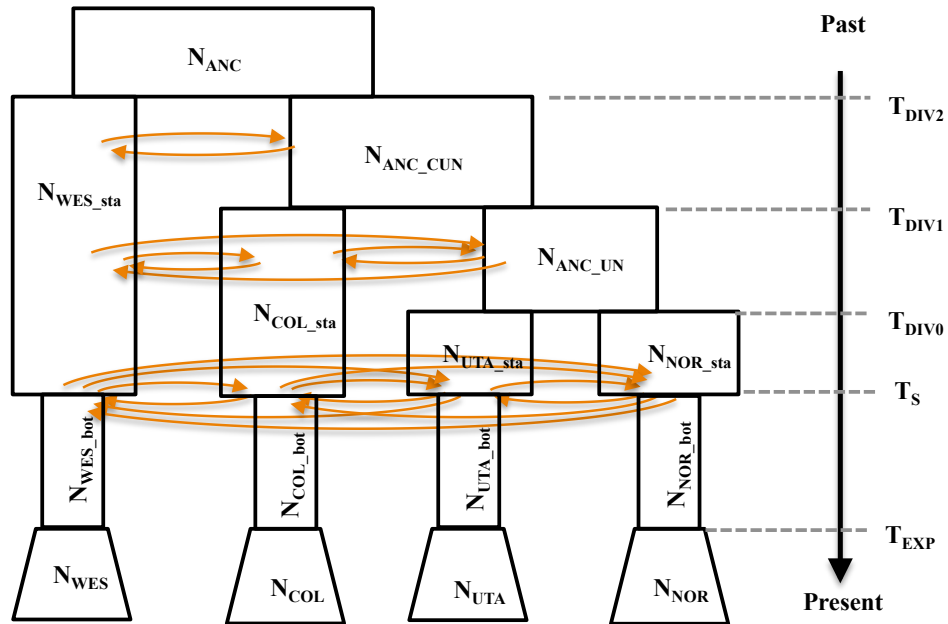

**Fig. S4. The best-fit demographic model inferred by *fastsimcoal2*.** Parameters with N denote effective population sizes of current and ancestral populations, and with T indicate time estimates of divergence ( $T_{DIV0}$ ,  $T_{DIV1}$  and  $T_{DIV2}$ ) and population expansion ( $T_{EXP}$ ).  $T_S$  is time of instantaneous size change. The arrows show the migration rate among groups. The inferred demographic parameters are shown in Table S6 and described in the text.

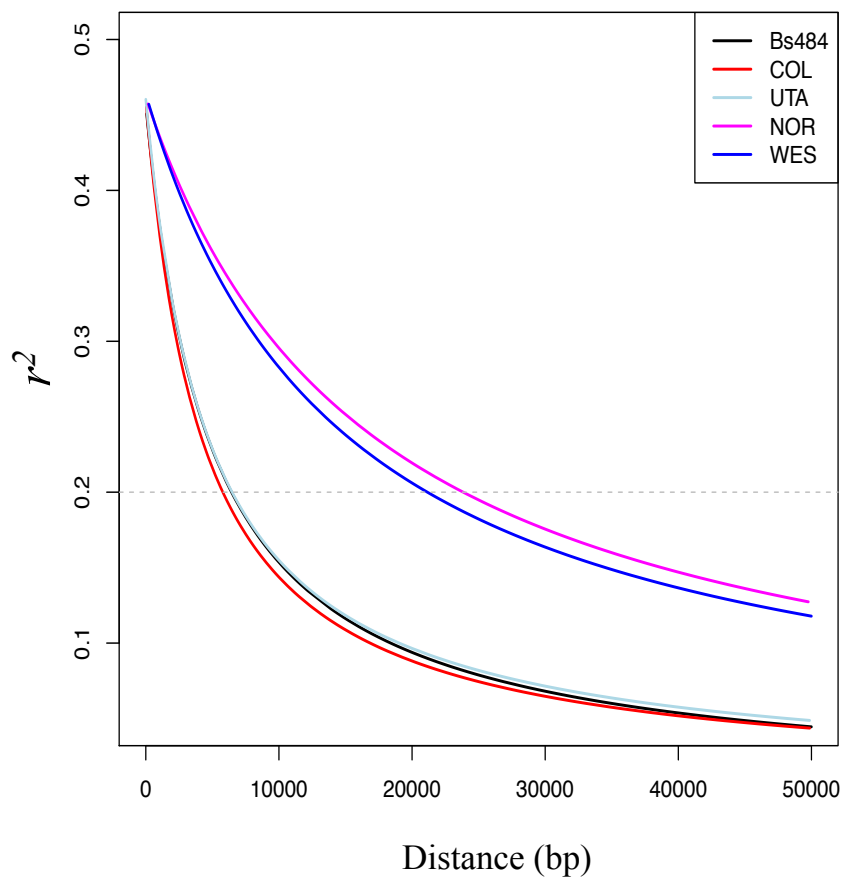

**Fig. S5. Genome-wide linkage disequilibrium (LD) in *B. stricta* based on common SNPs (minor allele frequency  $\geq 0.05$ ).** LD measured by  $r^2$  reaches background levels within  $\sim 50$  kb in the species-wide sample (Black), COL (Red), and UTA (light blue) groups, but extends longer in NOR (Pink) and WES (Blue) groups.

**A**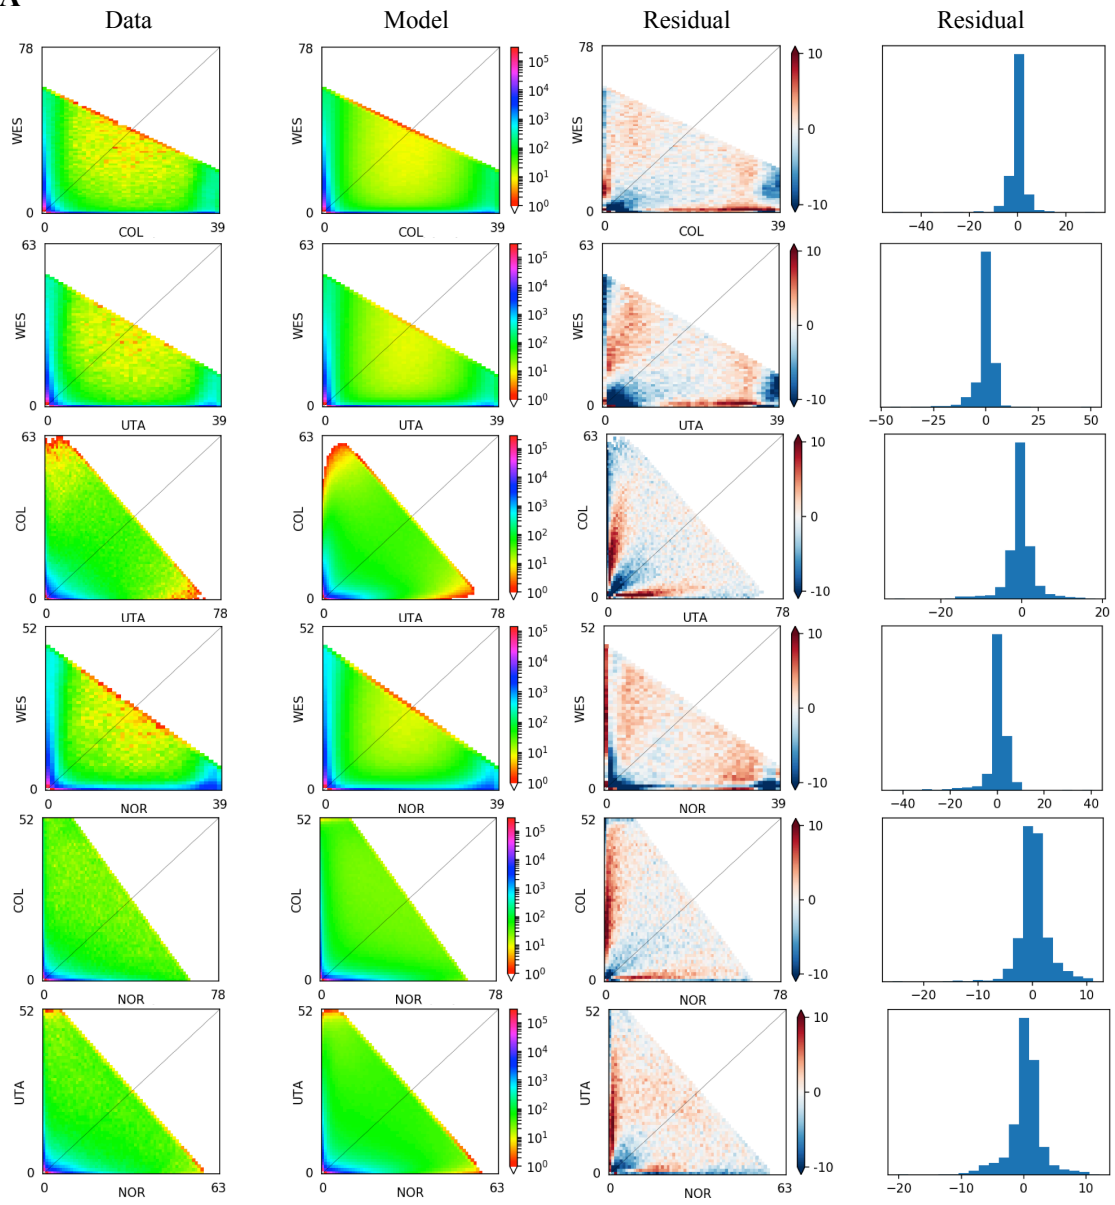



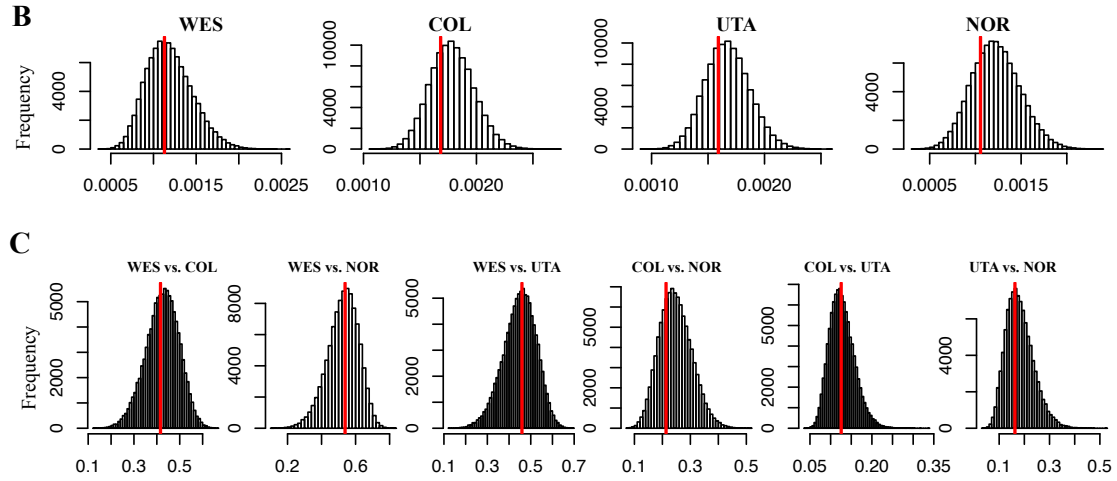

**Fig. S6. The goodness-of-fit of the best-fit demographic model inferred by fastsimcoal2.** (A), comparison between observed (data) joint site frequency spectrum (SFS) and expected (Model) joint SFS. The residual between Data and Model are plotted in a colormap and a histogram. In the color map, red or blue residuals indicate that model predicts too many or too few alleles in a given cell, respectively. (B), predicted distributions of simulated diversity ( $\pi$ ) in each group. (C), predicted distributions of simulated  $F_{ST}$  values in each group-pair. Red vertical bars indicate the mean values of observed data in B and C.

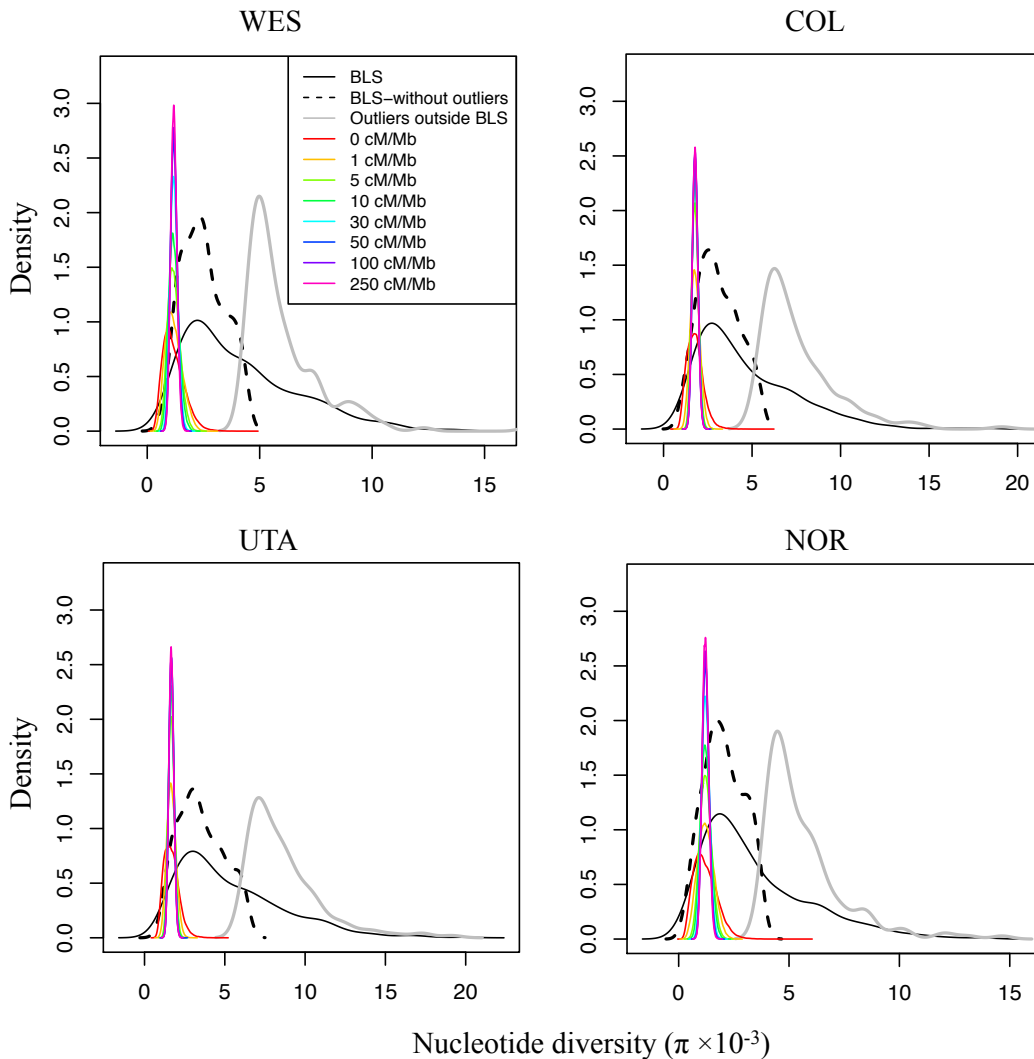

**Fig. S7. Predicted distributions of 100,000 simulated diversity ( $\pi$ , in unit of  $10^{-3}$ ) values in each group (WES, NOR, COL and UTA) under the best-fit demographic model (see Fig. S4).** Simulated results based on different recombination rates are show in colored lines. Black, dashed and grey lines show respectively: observed  $\pi$  values in the BLS genomic regions, BLS regions after excluding  $\pi$ -islands, and genome-wide  $\pi$ -islands outside BLS regions. For these three empirical distributions, the vertical axis is expanded 5-fold for visual clarity. Simulated results are significantly lower than the three empirical distribution ( $W$  ranges from 8322600 to 45812000,  $P < 2e^{-16}$ , Mann–Whitney U test).

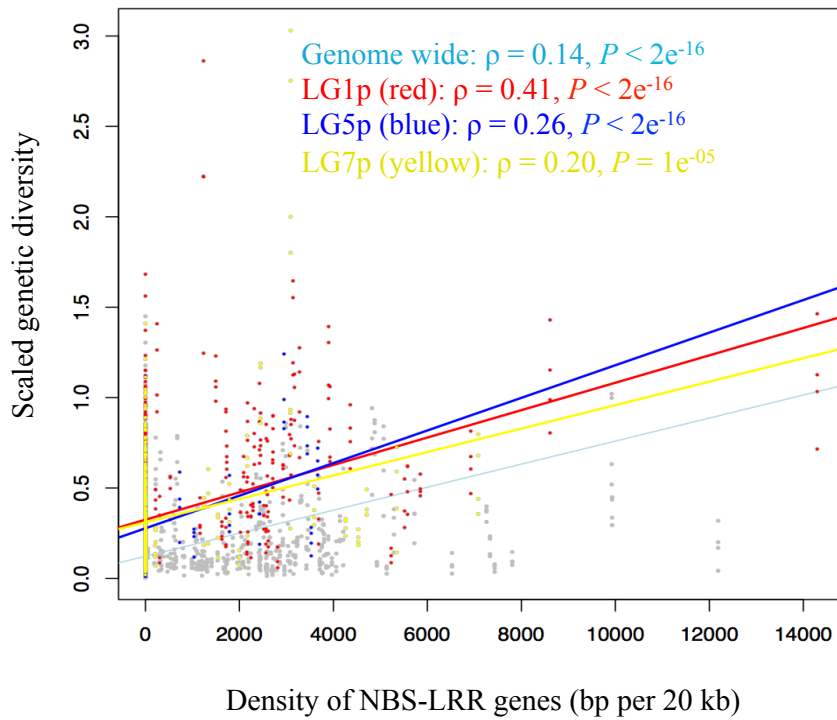

**Fig. S8. Correlation between scaled genetic diversity and density of NBS-LRR genes (total length of NBS-LRR genes in a 20-kb window).** Correlation and significance are tested with Spearman's rank correlation test in LG1p (red), LG5p (blue), LG7p (yellow) and genome-wide.

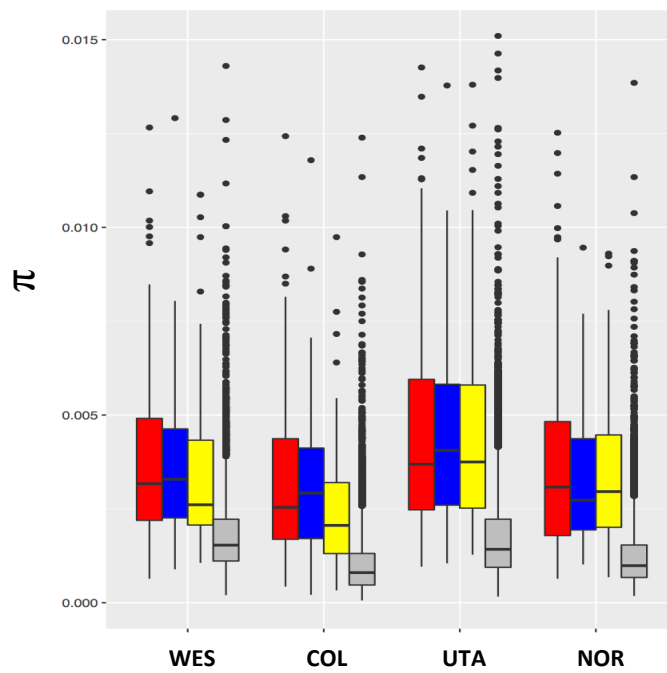

**Fig. S9. Comparisons of nucleotide diversity ( $\pi$ ) in LG1p (red), LG5p (blue), LG7p (yellow) regions versus genomic background (grey), after excluding NBS-LRR gene regions from the three genomic regions.** Genetic diversity in the three regions is significantly higher than genomic background in all groups ( $P < 10^{-5}$ , randomization test).

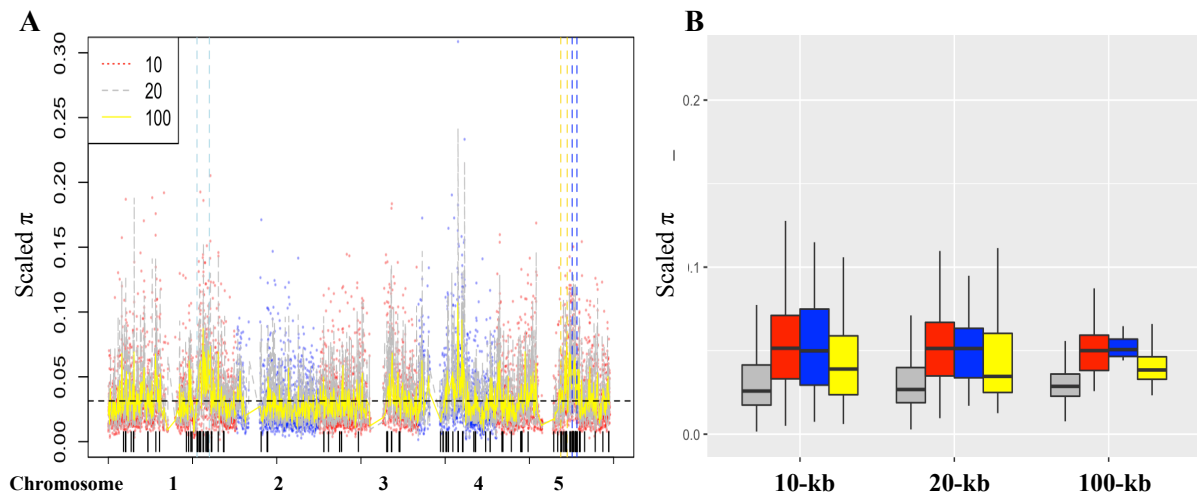

**Fig. S10. Genome-wide pattern of nucleotide diversity in *A. thaliana*.** (A), Scaled nucleotide diversity ( $\pi$ ) is plotted along the genome with windows of 10-kb (red and blue dots for alternating chromosomes), 20-kb (grey dashed line), and 100-kb (yellow line) non-overlapping windows. The dashed vertical lines mark three highly polymorphic genomic regions that are collinear in *B. stricta*. The dashed horizontal line indicates genome-wide average of  $\pi$  across 10-kb windows. NBS-LRR genes are indicated by black bars under the Manhattan plot. (B), Scaled nucleotide diversity ( $\pi$ ) in three collinear regions in *B. stricta*, LG1p (red), LG5p (blue) and LG7p (yellow) is significant higher than that in genomic background (grey).  $P < 0.01$  for 100-kb windows of LG7p vs. background;  $P < 0.001$  for all other comparisons. In each box plot, the median is shown by a horizontal line, while the bottom and top of each box represents the first and third quartiles. The whiskers extend to 1.5 times the interquartile range. Outliers are not shown in the plot.

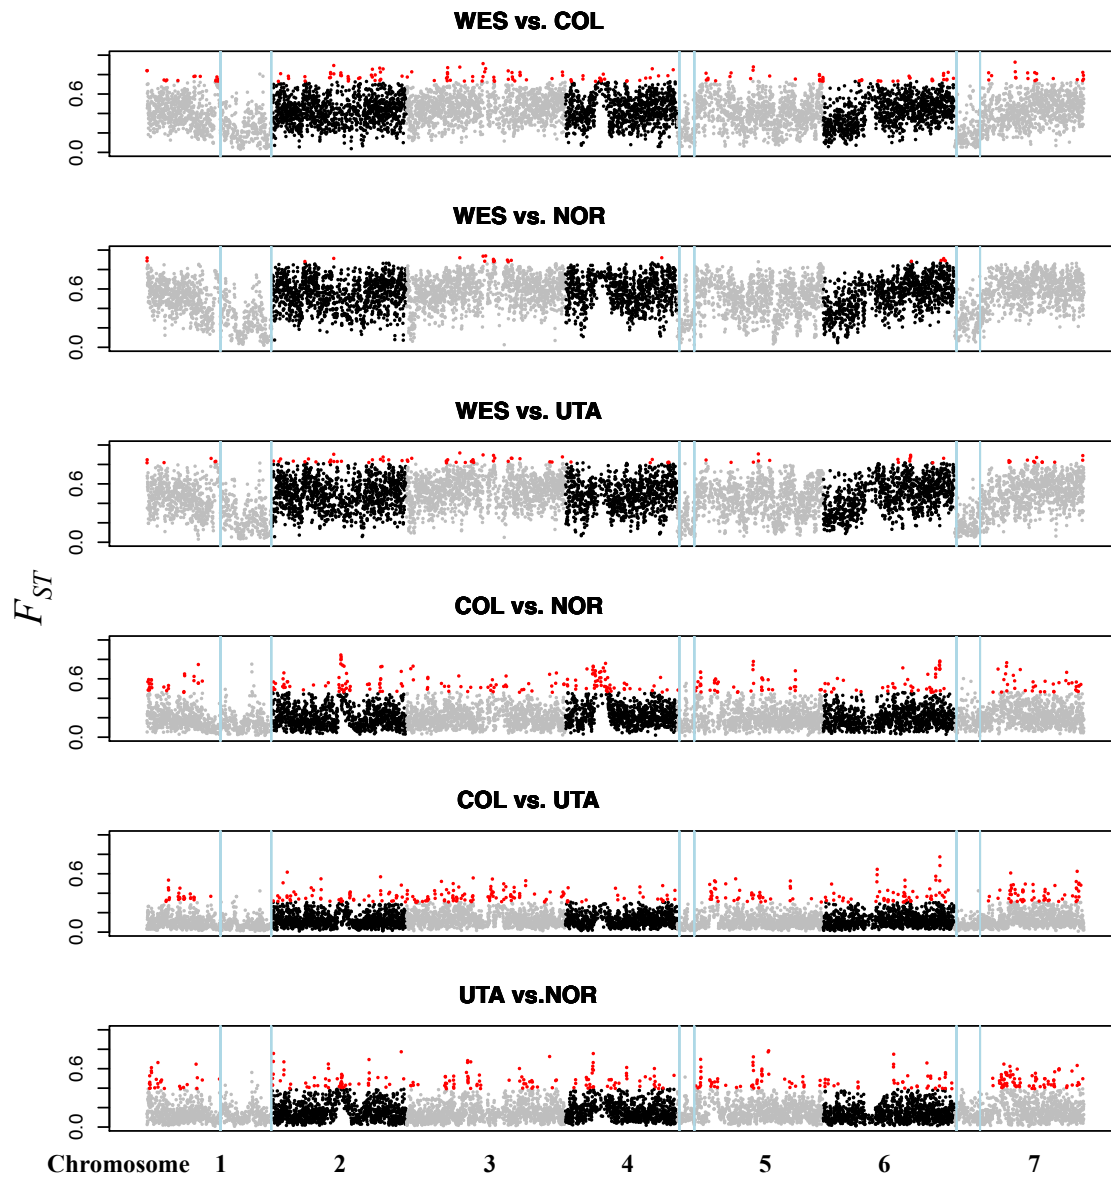

**Fig. S11. Manhattan plot of  $F_{ST}$  in 20-kb non-overlapping windows for six group pairs.** Alternating colors paint the different chromosomes, and the genomic islands of divergence are shown in red. The vertical lines (light blue) mark the three highly polymorphic genomic regions (see Fig. 3) that were not included in  $F_{ST}$  analyses.

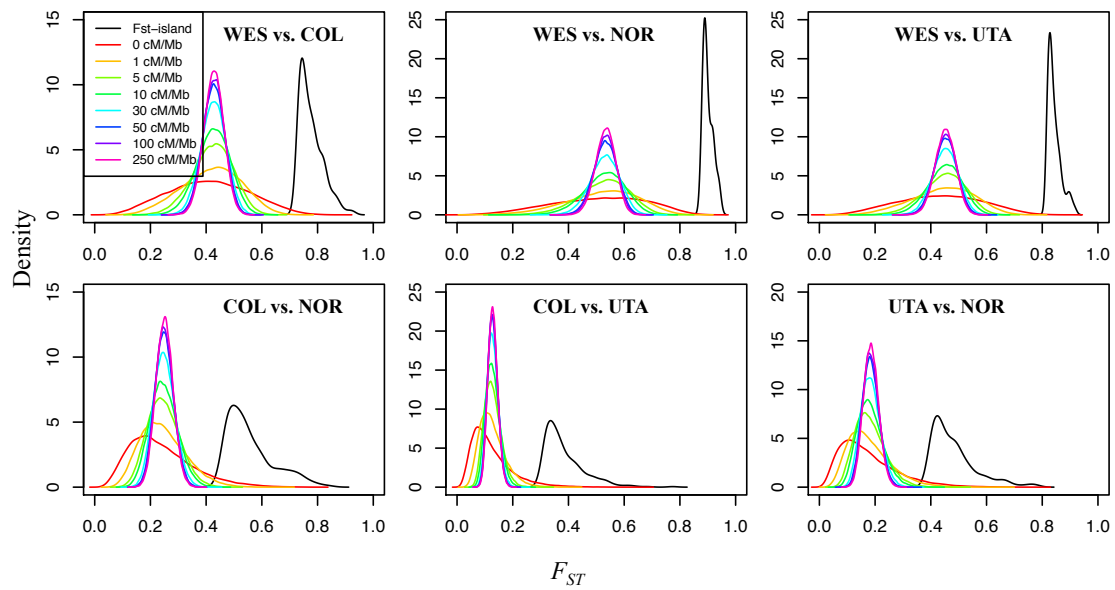

**Fig. S12. Predicted distributions of 100,000 simulated  $F_{ST}$  values among groups under the best-fit neutral demographic model (see Fig. S4). Simulated results based on different recombination rates (showed in colored lines) are significantly lower ( $W$  ranges from 1188900 to 35200000,  $P < 5e^{-16}$ , Mann–Whitney U test) than observed  $F_{ST}$  values in  $F_{ST}$ -islands (showed in black).**

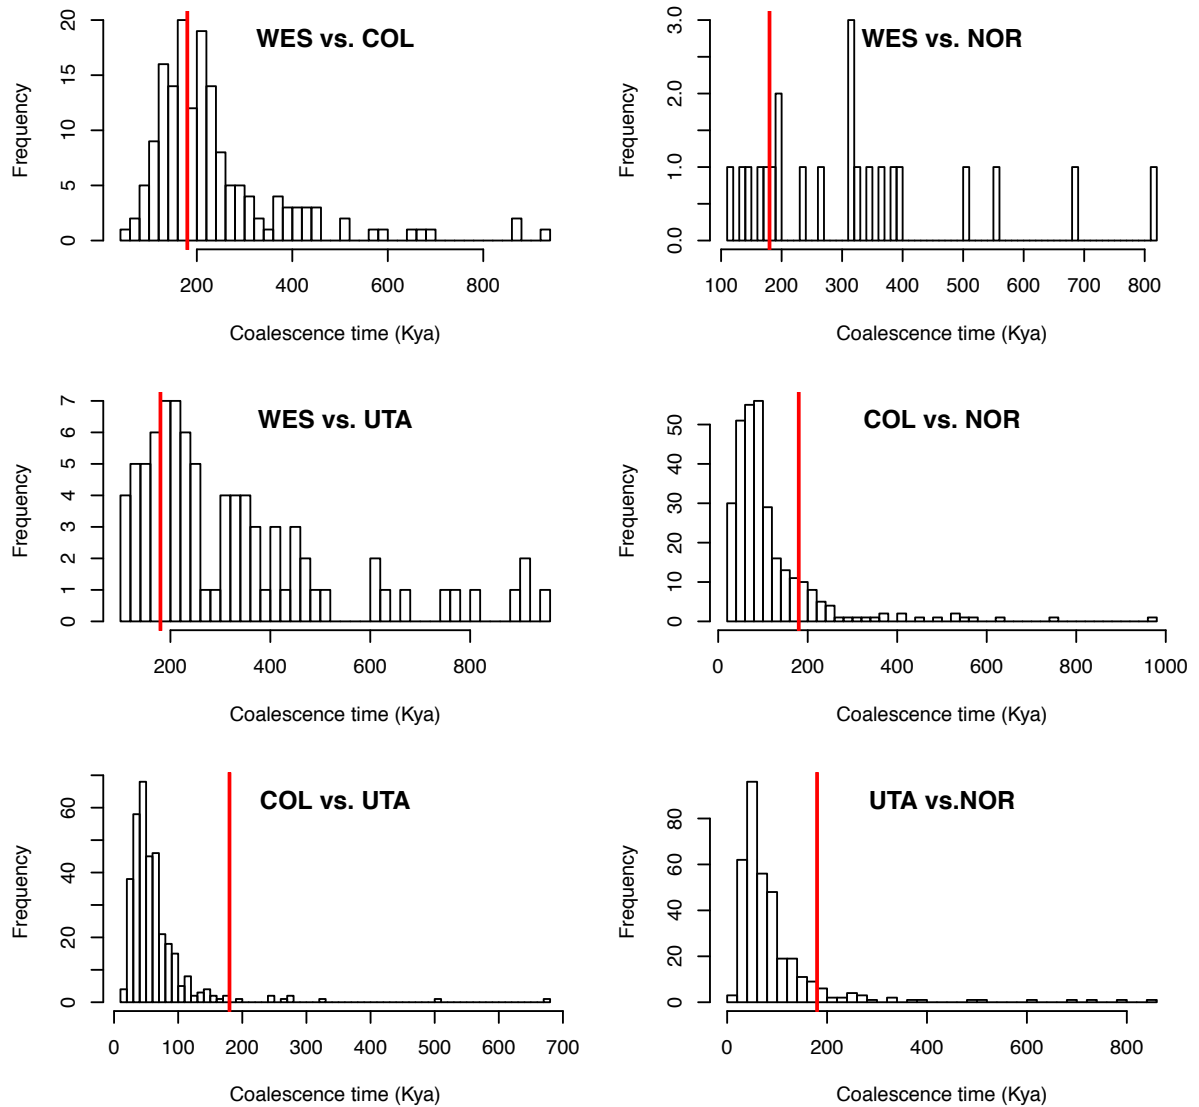

**Fig. S13. Coalescence time between haplotypes in 20-kb outlier windows, estimated using  $T = D_A/2\mu$ , where  $\mu$  is  $7 \times 10^{-9}$  per site per year. The red vertical line shows the splitting time between *WEST* and *EAST* subspecies of *Boechera stricta*.**



**A**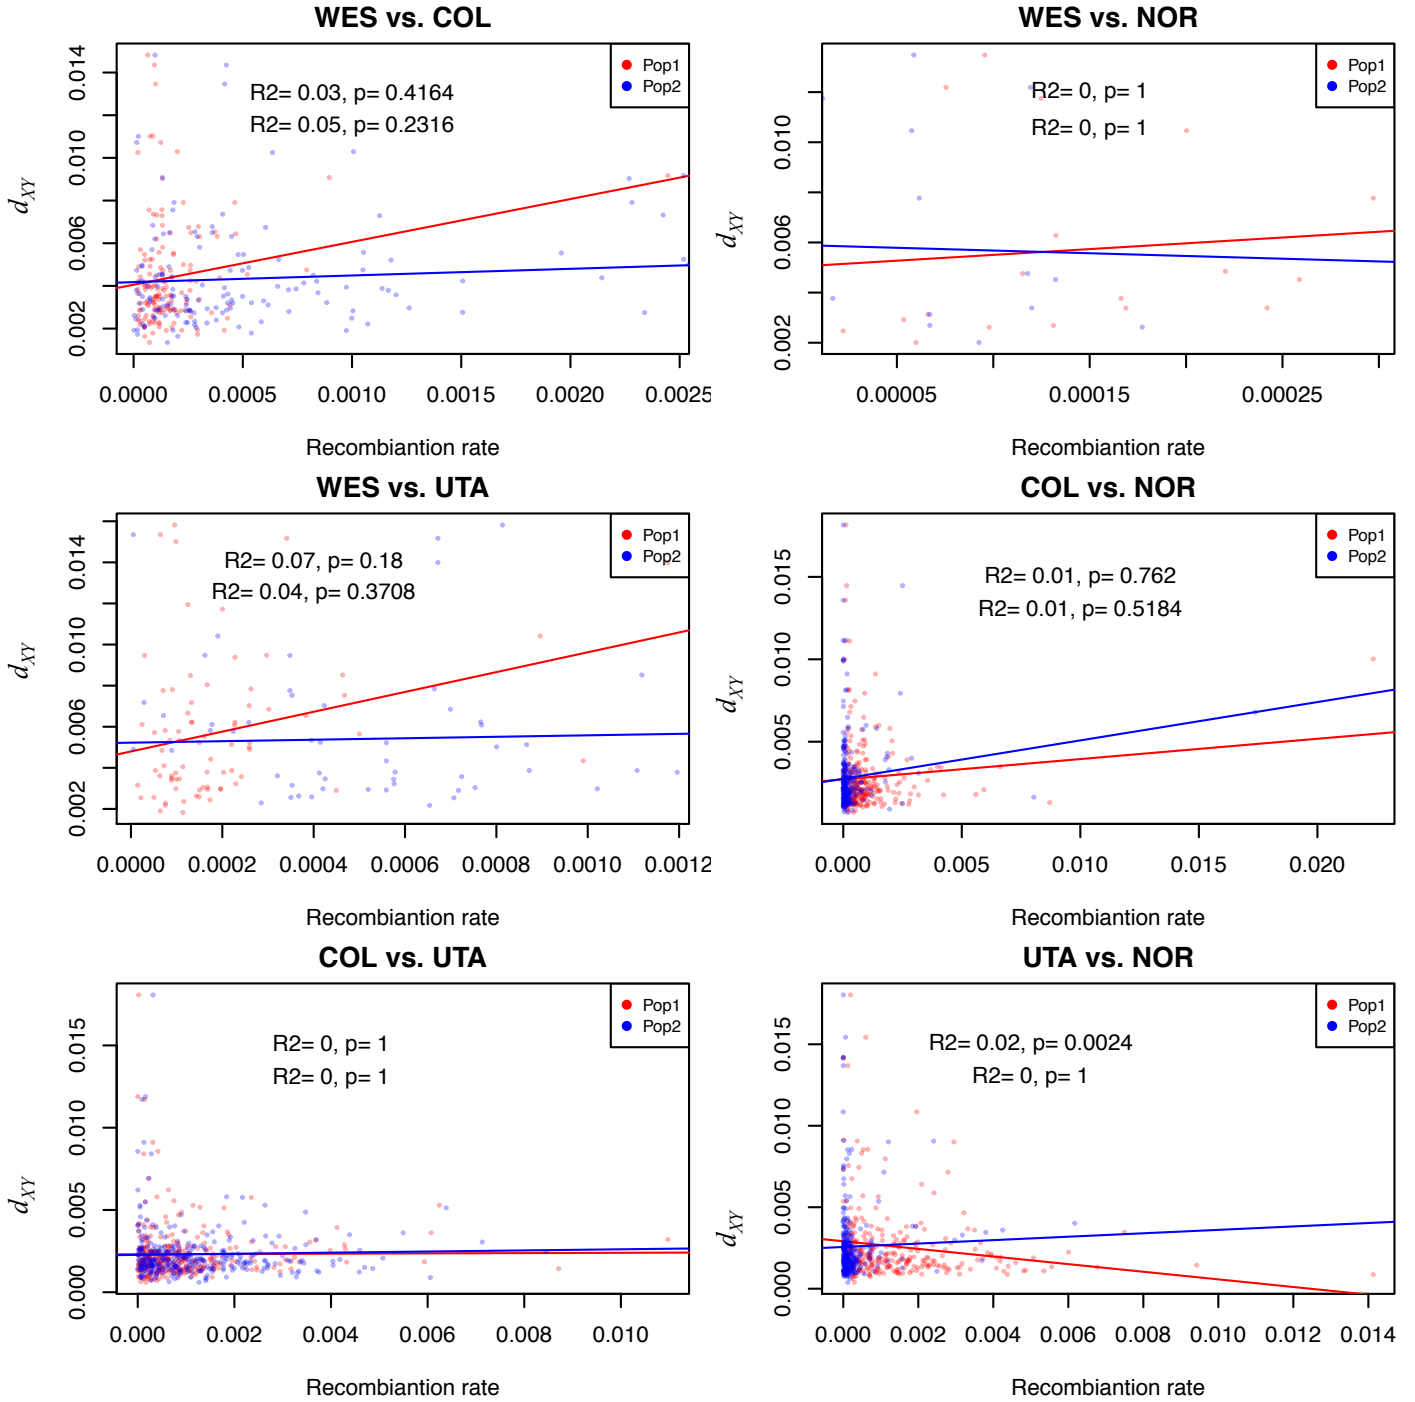

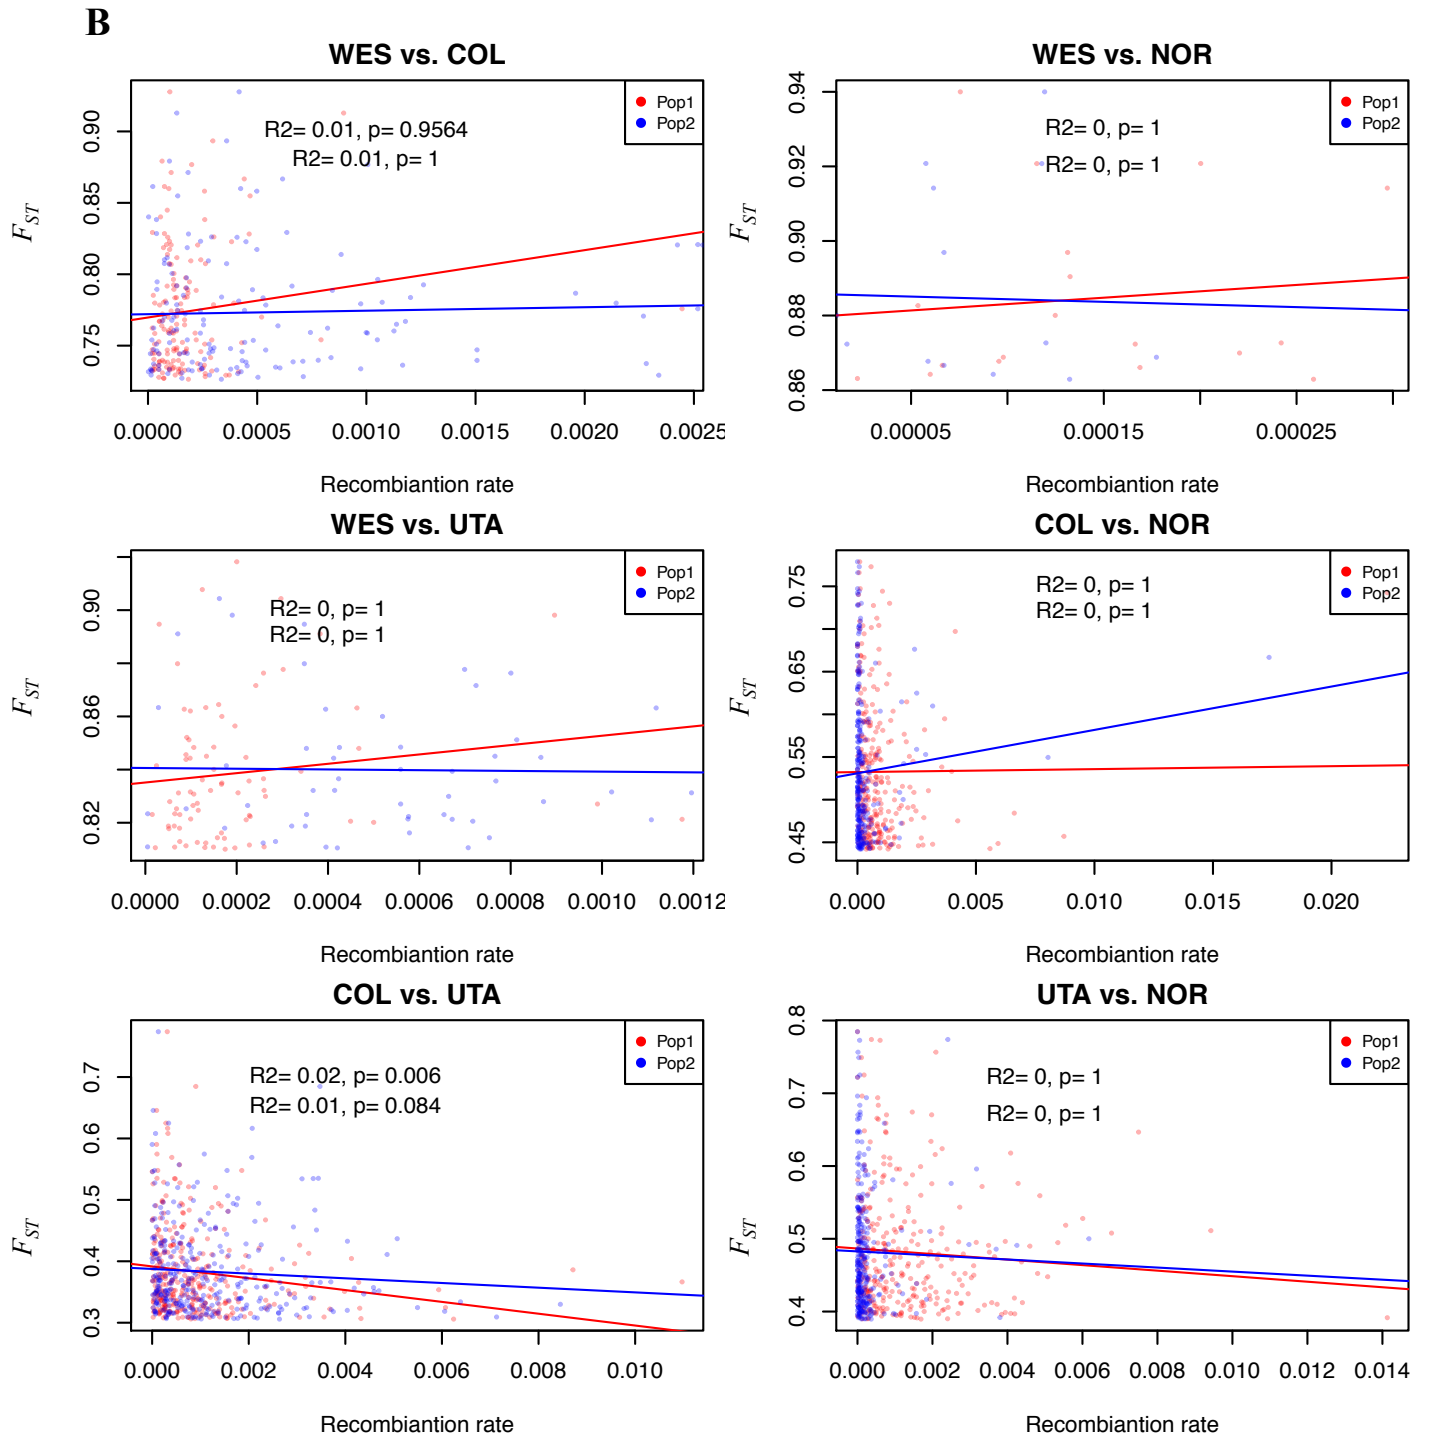

**Fig. S14. Relationship between population scaled-recombination rate ( $\rho = 4N_c c$ ) and genetic differentiation ( $d_{XY}$ : A and  $F_{ST}$ : B) for six pairwise combinations of groups. In each plot, adjusted  $R^2$  of linear regression and Bonferroni corrected  $P$ -value are shown.**

**Table S1** Whole genome re-sequenced inbred *Boechera stricta* accessions.

| SampleID | Latitude  | Longitude   | Group   | note                      |
|----------|-----------|-------------|---------|---------------------------|
| RP028    | 42.499000 | -110.794900 | Admixed | Included in data analyses |
| RP044    | 42.970000 | -109.766200 | Admixed | Included in data analyses |
| RP096    | 42.581000 | -110.739600 | Admixed | Included in data analyses |
| RP155    | 42.506000 | -110.678100 | Admixed | Included in data analyses |
| RP176    | 42.475000 | -110.616600 | Admixed | Included in data analyses |
| RP217    | 43.003000 | -109.753900 | Admixed | Included in data analyses |
| RP277    | 42.673130 | -108.876900 | Admixed | Included in data analyses |
| RP304    | 38.994270 | -107.065510 | Admixed | Included in data analyses |
| RP436    | 45.103070 | -111.870870 | Admixed | Included in data analyses |
| RP437    | 45.025650 | -111.846020 | Admixed | Included in data analyses |
| RP440    | 44.549270 | -112.091300 | Admixed | Included in data analyses |
| RP443    | 44.486200 | -112.112270 | Admixed | Included in data analyses |
| RP451    | 45.085750 | -111.864050 | Admixed | Included in data analyses |
| RP452    | 45.054870 | -111.839200 | Admixed | Included in data analyses |
| RP455    | 44.924870 | -111.836230 | Admixed | Included in data analyses |
| RP458    | 44.892200 | -111.655170 | Admixed | Included in data analyses |
| RP460    | 40.615950 | -111.507380 | Admixed | Included in data analyses |
| HET21    | 39.648880 | -107.159130 | COL     | Included in data analyses |
| RP001    | 38.506000 | -109.318900 | COL     | Included in data analyses |
| RP015    | 38.945000 | -106.988400 | COL     | Included in data analyses |
| RP026    | 40.693000 | -109.494600 | COL     | Included in data analyses |
| RP029    | 38.856000 | -107.061300 | COL     | Included in data analyses |
| RP031    | 39.761000 | -110.919400 | COL     | Included in data analyses |
| RP032    | 40.399630 | -106.119000 | COL     | Included in data analyses |
| RP034    | 39.906670 | -105.517170 | COL     | Included in data analyses |
| RP036    | 38.988500 | -107.006800 | COL     | Included in data analyses |
| RP042    | 40.001000 | -105.468100 | COL     | Included in data analyses |
| RP051    | 38.898000 | -107.202600 | COL     | Included in data analyses |
| RP057    | 38.692000 | -106.822900 | COL     | Included in data analyses |
| RP058    | 40.309000 | -106.062100 | COL     | Included in data analyses |
| RP065    | 38.976100 | -106.989700 | COL     | Included in data analyses |
| RP067    | 38.707000 | -106.804500 | COL     | Included in data analyses |
| RP073    | 39.951000 | -105.593600 | COL     | Included in data analyses |
| RP077    | 38.969500 | -106.967200 | COL     | Included in data analyses |
| RP083    | 38.775000 | -106.626900 | COL     | Included in data analyses |
| RP085    | 38.301000 | -107.355800 | COL     | Included in data analyses |
| RP086    | 38.730000 | -106.820100 | COL     | Included in data analyses |
| RP100    | 38.510000 | -109.318800 | COL     | Included in data analyses |
| RP110    | 38.725700 | -106.759400 | COL     | Included in data analyses |
| RP111    | 38.762000 | -106.862800 | COL     | Included in data analyses |

|       |           |             |     |                           |
|-------|-----------|-------------|-----|---------------------------|
| RP125 | 39.684000 | -105.607100 | COL | Included in data analyses |
| RP133 | 40.080000 | -105.532500 | COL | Included in data analyses |
| RP139 | 40.544000 | -106.625000 | COL | Included in data analyses |
| RP146 | 39.000000 | -107.022300 | COL | Included in data analyses |
| RP151 | 38.850000 | -107.100900 | COL | Included in data analyses |
| RP152 | 39.864000 | -105.444700 | COL | Included in data analyses |
| RP153 | 38.543000 | -109.301800 | COL | Included in data analyses |
| RP156 | 38.958000 | -106.988800 | COL | Included in data analyses |
| RP164 | 38.963000 | -106.987600 | COL | Included in data analyses |
| RP175 | 38.976000 | -106.998600 | COL | Included in data analyses |
| RP195 | 37.807600 | -109.818700 | COL | Included in data analyses |
| RP199 | 44.404000 | -103.938400 | COL | Included in data analyses |
| RP220 | 38.666000 | -106.838700 | COL | Included in data analyses |
| RP221 | 38.858000 | -107.154700 | COL | Included in data analyses |
| RP229 | 38.828000 | -106.835300 | COL | Included in data analyses |
| RP234 | 38.963000 | -106.992500 | COL | Included in data analyses |
| RP245 | 38.768000 | -106.766000 | COL | Included in data analyses |
| RP255 | 38.727000 | -106.761800 | COL | Included in data analyses |
| RP261 | 38.746100 | -106.673000 | COL | Included in data analyses |
| RP262 | 38.758000 | -106.680300 | COL | Included in data analyses |
| RP265 | 38.807000 | -106.563200 | COL | Included in data analyses |
| RP270 | 44.300750 | -107.305780 | COL | Included in data analyses |
| RP272 | 40.520600 | -105.892700 | COL | Included in data analyses |
| RP273 | 42.744510 | -106.325100 | COL | Included in data analyses |
| RP274 | 44.282760 | -106.991600 | COL | Included in data analyses |
| RP275 | 41.226670 | -105.382920 | COL | Included in data analyses |
| RP278 | 41.339170 | -106.375280 | COL | Included in data analyses |
| RP279 | 41.331220 | -106.502220 | COL | Included in data analyses |
| RP281 | 40.607780 | -108.863000 | COL | Included in data analyses |
| RP285 | 38.531580 | -106.324170 | COL | Included in data analyses |
| RP290 | 39.007670 | -106.998850 | COL | Included in data analyses |
| RP291 | 39.015050 | -107.035200 | COL | Included in data analyses |
| RP294 | 39.012920 | -106.946350 | COL | Included in data analyses |
| RP295 | 38.998120 | -106.981200 | COL | Included in data analyses |
| RP296 | 38.969920 | -107.026730 | COL | Included in data analyses |
| RP301 | 38.870260 | -106.951970 | COL | Included in data analyses |
| RP306 | 38.866420 | -106.912770 | COL | Included in data analyses |
| RP308 | 38.878800 | -106.999120 | COL | Included in data analyses |
| RP482 | 39.641290 | -105.870730 | COL | Included in data analyses |
| RP483 | 40.198160 | -105.541250 | COL | Included in data analyses |
| RP484 | 39.692450 | -105.795840 | COL | Included in data analyses |
| RP485 | 40.257200 | -105.533550 | COL | Included in data analyses |

|       |           |             |     |                           |
|-------|-----------|-------------|-----|---------------------------|
| RP486 | 39.353760 | -106.217130 | COL | Included in data analyses |
| RP488 | 39.411700 | -106.174610 | COL | Included in data analyses |
| RP489 | 39.457880 | -106.144690 | COL | Included in data analyses |
| RP490 | 38.767340 | -106.319620 | COL | Included in data analyses |
| RP491 | 40.101220 | -105.486010 | COL | Included in data analyses |
| RP492 | 38.813730 | -106.396570 | COL | Included in data analyses |
| RP494 | 39.762820 | -105.729630 | COL | Included in data analyses |
| RP495 | 39.198920 | -106.260550 | COL | Included in data analyses |
| RP496 | 39.200070 | -106.079460 | COL | Included in data analyses |
| RP497 | 39.237320 | -106.293110 | COL | Included in data analyses |
| RP498 | 39.890790 | -105.486350 | COL | Included in data analyses |
| RP499 | 39.817150 | -105.536340 | COL | Included in data analyses |
| RP500 | 39.612320 | -105.716610 | COL | Included in data analyses |
| RP501 | 39.770820 | -105.817910 | COL | Included in data analyses |
| RP502 | 39.449810 | -105.775020 | COL | Included in data analyses |
| RP503 | 39.067620 | -106.505270 | COL | Included in data analyses |
| RP505 | 39.668870 | -105.882540 | COL | Included in data analyses |
| RP506 | 39.663650 | -105.878380 | COL | Included in data analyses |
| RP507 | 39.660070 | -105.871960 | COL | Included in data analyses |
| RP508 | 39.686850 | -105.881510 | COL | Included in data analyses |
| RP510 | 39.896050 | -105.602040 | COL | Included in data analyses |
| RP512 | 39.866900 | -105.595120 | COL | Included in data analyses |
| RP513 | 39.852180 | -105.571110 | COL | Included in data analyses |
| RP514 | 39.441450 | -106.157630 | COL | Included in data analyses |
| RP515 | 39.604770 | -105.909850 | COL | Included in data analyses |
| RP516 | 40.034590 | -105.539950 | COL | Included in data analyses |
| RP522 | 39.401970 | -106.051390 | COL | Included in data analyses |
| RP524 | 39.908250 | -105.556470 | COL | Included in data analyses |
| RP525 | 39.566590 | -105.724130 | COL | Included in data analyses |
| RP527 | 40.131330 | -105.505080 | COL | Included in data analyses |
| RP528 | 39.362640 | -106.311170 | COL | Included in data analyses |
| RP530 | 39.528680 | -106.220160 | COL | Included in data analyses |
| RP532 | 39.090530 | -106.145690 | COL | Included in data analyses |
| RP533 | 39.471850 | -106.043040 | COL | Included in data analyses |
| RP537 | 37.424100 | -108.379220 | COL | Included in data analyses |
| RP538 | 37.361130 | -108.252630 | COL | Included in data analyses |
| RP558 | 39.835100 | -105.411980 | COL | Included in data analyses |
| RP559 | 39.835100 | -105.411980 | COL | Included in data analyses |
| RP560 | 39.835100 | -105.411980 | COL | Included in data analyses |
| RP561 | 39.835100 | -105.411980 | COL | Included in data analyses |
| RP562 | 39.835100 | -105.411980 | COL | Included in data analyses |
| RP563 | 39.835100 | -105.411980 | COL | Included in data analyses |

|       |           |             |     |                           |
|-------|-----------|-------------|-----|---------------------------|
| RP564 | 39.835100 | -105.411980 | COL | Included in data analyses |
| RP565 | 39.835100 | -105.411980 | COL | Included in data analyses |
| RP566 | 39.796340 | -105.775810 | COL | Included in data analyses |
| RP567 | 39.796340 | -105.775810 | COL | Included in data analyses |
| RP568 | 39.796340 | -105.775810 | COL | Included in data analyses |
| RP569 | 39.796340 | -105.775810 | COL | Included in data analyses |
| RP581 | 38.361133 | -108.252633 | COL | Included in data analyses |
| RP591 | 38.440633 | -107.642283 | COL | Included in data analyses |
| RP592 | 37.648167 | -106.651917 | COL | Included in data analyses |
| RP593 | 37.646750 | -106.588833 | COL | Included in data analyses |
| RP595 | 37.579183 | -108.157050 | COL | Included in data analyses |
| RP596 | 37.369417 | -108.078667 | COL | Included in data analyses |
| RP598 | 37.600883 | -105.212100 | COL | Included in data analyses |
| RP600 | 37.381033 | -108.077367 | COL | Included in data analyses |
| RP601 | 37.780067 | -106.818183 | COL | Included in data analyses |
| RP602 | 37.796117 | -106.801650 | COL | Included in data analyses |
| RP603 | 37.754867 | -108.007050 | COL | Included in data analyses |
| RP604 | 37.616283 | -106.675783 | COL | Included in data analyses |
| RP605 | 38.332333 | -108.107483 | COL | Included in data analyses |
| RP606 | 38.319467 | -108.140000 | COL | Included in data analyses |
| RP607 | 38.486833 | -108.573067 | COL | Included in data analyses |
| RP608 | 38.521100 | -108.603317 | COL | Included in data analyses |
| RP609 | 38.596617 | -108.655700 | COL | Included in data analyses |
| RP610 | 38.655950 | -108.699867 | COL | Included in data analyses |
| RP611 | 37.485433 | -106.768533 | COL | Included in data analyses |
| RP622 | 39.950023 | -105.504519 | COL | Included in data analyses |
| RP623 | 38.702642 | -106.349831 | COL | Included in data analyses |
| RP624 | 40.017370 | -105.532090 | COL | Included in data analyses |
| RP625 | 38.987883 | -106.429597 | COL | Included in data analyses |
| RP626 | 38.422137 | -106.132842 | COL | Included in data analyses |
| RP627 | 39.274043 | -106.309739 | COL | Included in data analyses |
| RP629 | 39.327870 | -106.059082 | COL | Included in data analyses |
| RP630 | 39.888743 | -105.609193 | COL | Included in data analyses |
| RP631 | 39.904039 | -105.497315 | COL | Included in data analyses |
| RP632 | 39.588520 | -106.044552 | COL | Included in data analyses |
| RP633 | 39.626107 | -105.708153 | COL | Included in data analyses |
| RP643 | 38.285100 | -107.367000 | COL | Included in data analyses |
| RP650 | 39.012517 | -108.234950 | COL | Included in data analyses |
| RP651 | 39.025367 | -108.223650 | COL | Included in data analyses |
| RP652 | 39.036417 | -108.187733 | COL | Included in data analyses |
| RP653 | 39.006050 | -108.199717 | COL | Included in data analyses |
| RP654 | 39.004067 | -108.145583 | COL | Included in data analyses |

|       |           |             |     |                           |
|-------|-----------|-------------|-----|---------------------------|
| RP655 | 39.004283 | -108.110100 | COL | Included in data analyses |
| RP656 | 39.025817 | -108.073600 | COL | Included in data analyses |
| RP657 | 39.059633 | -108.054067 | COL | Included in data analyses |
| RP658 | 39.049967 | -108.081033 | COL | Included in data analyses |
| RP659 | 39.046100 | -108.068117 | COL | Included in data analyses |
| RP660 | 39.028133 | -108.032517 | COL | Included in data analyses |
| RP661 | 39.030250 | -107.996333 | COL | Included in data analyses |
| RP662 | 39.003550 | -107.940917 | COL | Included in data analyses |
| HZ015 | 44.970670 | -114.085850 | NOR | Included in data analyses |
| HZ024 | 44.964830 | -114.074620 | NOR | Included in data analyses |
| HZ037 | 44.962670 | -114.069700 | NOR | Included in data analyses |
| HZ057 | 44.581880 | -114.416730 | NOR | Included in data analyses |
| HZ062 | 44.581880 | -114.416730 | NOR | Included in data analyses |
| HZ068 | 44.397000 | -114.391170 | NOR | Included in data analyses |
| HZ104 | 44.457280 | -114.752880 | NOR | Included in data analyses |
| HZ110 | 44.457280 | -114.752880 | NOR | Included in data analyses |
| HZ117 | 44.475000 | -114.730700 | NOR | Included in data analyses |
| HZ121 | 44.475000 | -114.730700 | NOR | Included in data analyses |
| HZ140 | 44.494000 | -114.734000 | NOR | Included in data analyses |
| HZ143 | 44.494000 | -114.734000 | NOR | Included in data analyses |
| HZ156 | 44.503000 | -114.753200 | NOR | Included in data analyses |
| HZ160 | 44.457280 | -114.752880 | NOR | Included in data analyses |
| HZ170 | 44.581880 | -114.416730 | NOR | Included in data analyses |
| HZ300 | 44.792383 | -113.776183 | NOR | Included in data analyses |
| HZ334 | 44.797467 | -113.803217 | NOR | Included in data analyses |
| HZ337 | 44.792600 | -113.778883 | NOR | Included in data analyses |
| HZ349 | 45.083733 | -114.089667 | NOR | Included in data analyses |
| HZ374 | 44.861967 | -114.295217 | NOR | Included in data analyses |
| HZ444 | 44.747100 | -114.260550 | NOR | Included in data analyses |
| RP003 | 44.620000 | -114.514100 | NOR | Included in data analyses |
| RP010 | 44.622000 | -114.496800 | NOR | Included in data analyses |
| RP014 | 41.844000 | -115.447300 | NOR | Included in data analyses |
| RP016 | 43.792000 | -114.573700 | NOR | Included in data analyses |
| RP024 | 44.355000 | -113.262300 | NOR | Included in data analyses |
| RP035 | 44.615620 | -114.518430 | NOR | Included in data analyses |
| RP048 | 44.616000 | -114.518400 | NOR | Included in data analyses |
| RP049 | 44.941000 | -113.847400 | NOR | Included in data analyses |
| RP054 | 44.591600 | -114.453300 | NOR | Included in data analyses |
| RP059 | 44.346000 | -113.265000 | NOR | Included in data analyses |
| RP061 | 44.411200 | -113.417500 | NOR | Included in data analyses |
| RP064 | 44.674000 | -114.558200 | NOR | Included in data analyses |
| RP069 | 44.948000 | -114.074100 | NOR | Included in data analyses |

|       |           |             |     |                           |
|-------|-----------|-------------|-----|---------------------------|
| RP078 | 44.967000 | -114.085300 | NOR | Included in data analyses |
| RP079 | 44.494000 | -114.734000 | NOR | Included in data analyses |
| RP080 | 44.966300 | -114.085400 | NOR | Included in data analyses |
| RP082 | 44.364000 | -113.234000 | NOR | Included in data analyses |
| RP087 | 44.182600 | -113.742900 | NOR | Included in data analyses |
| RP088 | 42.139000 | -114.208500 | NOR | Included in data analyses |
| RP091 | 42.163000 | -114.263800 | NOR | Included in data analyses |
| RP094 | 44.754000 | -114.679400 | NOR | Included in data analyses |
| RP099 | 42.144000 | -114.242800 | NOR | Included in data analyses |
| RP101 | 44.027000 | -113.453000 | NOR | Included in data analyses |
| RP103 | 44.606900 | -114.533900 | NOR | Included in data analyses |
| RP104 | 44.426000 | -112.894500 | NOR | Included in data analyses |
| RP107 | 44.660000 | -114.542400 | NOR | Included in data analyses |
| RP108 | 44.142000 | -113.722200 | NOR | Included in data analyses |
| RP116 | 44.642000 | -114.529000 | NOR | Included in data analyses |
| RP117 | 44.962000 | -114.073300 | NOR | Included in data analyses |
| RP118 | 44.974300 | -114.085000 | NOR | Included in data analyses |
| RP121 | 44.374500 | -113.388300 | NOR | Included in data analyses |
| RP127 | 43.804000 | -114.643100 | NOR | Included in data analyses |
| RP132 | 44.643500 | -114.541600 | NOR | Included in data analyses |
| RP135 | 45.551000 | -113.774200 | NOR | Included in data analyses |
| RP138 | 44.963000 | -114.655800 | NOR | Included in data analyses |
| RP140 | 42.322000 | -113.619400 | NOR | Included in data analyses |
| RP141 | 44.551000 | -112.616800 | NOR | Included in data analyses |
| RP159 | 44.492000 | -115.007000 | NOR | Included in data analyses |
| RP160 | 44.390400 | -113.418300 | NOR | Included in data analyses |
| RP162 | 43.875000 | -114.714900 | NOR | Included in data analyses |
| RP166 | 44.410000 | -114.407700 | NOR | Included in data analyses |
| RP169 | 44.457000 | -114.752900 | NOR | Included in data analyses |
| RP173 | 41.801000 | -115.479000 | NOR | Included in data analyses |
| RP179 | 44.791000 | -113.312600 | NOR | Included in data analyses |
| RP184 | 43.839000 | -114.294700 | NOR | Included in data analyses |
| RP185 | 43.931000 | -114.852800 | NOR | Included in data analyses |
| RP187 | 41.746000 | -115.467600 | NOR | Included in data analyses |
| RP197 | 44.348000 | -113.476100 | NOR | Included in data analyses |
| RP203 | 44.729000 | -114.332300 | NOR | Included in data analyses |
| RP204 | 44.970600 | -114.086300 | NOR | Included in data analyses |
| RP206 | 44.231600 | -113.838100 | NOR | Included in data analyses |
| RP213 | 44.536000 | -112.618000 | NOR | Included in data analyses |
| RP216 | 44.718000 | -114.621900 | NOR | Included in data analyses |
| RP235 | 44.376300 | -113.412700 | NOR | Included in data analyses |
| RP237 | 44.971100 | -114.170900 | NOR | Included in data analyses |



|       |           |             |     |                           |
|-------|-----------|-------------|-----|---------------------------|
| RP239 | 44.964300 | -114.193100 | NOR | Included in data analyses |
| RP240 | 44.737600 | -114.297700 | NOR | Included in data analyses |
| RP241 | 44.683500 | -114.342500 | NOR | Included in data analyses |
| RP242 | 44.692800 | -114.335300 | NOR | Included in data analyses |
| RP248 | 44.773400 | -114.248800 | NOR | Included in data analyses |
| RP251 | 44.741400 | -114.264100 | NOR | Included in data analyses |
| RP256 | 44.727000 | -114.637400 | NOR | Included in data analyses |
| RP258 | 44.622500 | -114.513700 | NOR | Included in data analyses |
| RP259 | 44.621100 | -114.507900 | NOR | Included in data analyses |
| RP260 | 44.354700 | -113.328800 | NOR | Included in data analyses |
| RP264 | 44.589700 | -114.448000 | NOR | Included in data analyses |
| RP266 | 44.305100 | -113.312800 | NOR | Included in data analyses |
| RP311 | 44.187667 | -113.753333 | NOR | Included in data analyses |
| RP312 | 44.189550 | -113.743433 | NOR | Included in data analyses |
| RP313 | 44.188417 | -113.746650 | NOR | Included in data analyses |
| RP314 | 44.183780 | -113.726620 | NOR | Included in data analyses |
| RP316 | 44.194650 | -113.741267 | NOR | Included in data analyses |
| RP317 | 44.181767 | -113.751750 | NOR | Included in data analyses |
| RP319 | 44.176480 | -113.771370 | NOR | Included in data analyses |
| RP320 | 44.172700 | -113.770180 | NOR | Included in data analyses |
| RP321 | 44.197200 | -113.756800 | NOR | Included in data analyses |
| RP322 | 44.185167 | -113.766000 | NOR | Included in data analyses |
| RP323 | 44.179833 | -113.775167 | NOR | Included in data analyses |
| RP476 | 44.252400 | -113.120780 | NOR | Included in data analyses |
| RP477 | 44.589150 | -113.456170 | NOR | Included in data analyses |
| RP616 | 44.402830 | -114.383170 | NOR | Included in data analyses |
| RP617 | 44.193400 | -113.736220 | NOR | Included in data analyses |
| RP621 | 44.576540 | -113.470870 | NOR | Included in data analyses |
| RP644 | 43.812000 | -114.619900 | NOR | Included in data analyses |
| RP008 | 40.435000 | -111.616000 | UTA | Included in data analyses |
| RP012 | 40.684000 | -110.931800 | UTA | Included in data analyses |
| RP075 | 40.736000 | -110.867600 | UTA | Included in data analyses |
| RP093 | 38.793000 | -116.859200 | UTA | Included in data analyses |
| RP095 | 42.596000 | -110.508300 | UTA | Included in data analyses |
| RP143 | 42.485000 | -110.545000 | UTA | Included in data analyses |
| RP145 | 40.612000 | -115.370900 | UTA | Included in data analyses |
| RP165 | 36.406000 | -112.091700 | UTA | Included in data analyses |
| RP181 | 37.612000 | -112.830300 | UTA | Included in data analyses |
| RP190 | 41.922000 | -111.478300 | UTA | Included in data analyses |
| RP196 | 40.823000 | -110.863400 | UTA | Included in data analyses |
| RP207 | 37.516000 | -112.704200 | UTA | Included in data analyses |
| RP214 | 38.966000 | -111.572200 | UTA | Included in data analyses |

|       |           |             |     |                           |
|-------|-----------|-------------|-----|---------------------------|
| RP219 | 38.965000 | -112.098800 | UTA | Included in data analyses |
| RP236 | 39.765000 | -110.916300 | UTA | Included in data analyses |
| RP280 | 43.542410 | -109.837000 | UTA | Included in data analyses |
| RP324 | 38.211250 | -112.425870 | UTA | Included in data analyses |
| RP325 | 37.879000 | -111.870430 | UTA | Included in data analyses |
| RP326 | 38.004970 | -111.712600 | UTA | Included in data analyses |
| RP327 | 39.883470 | -110.775620 | UTA | Included in data analyses |
| RP328 | 39.879030 | -110.799700 | UTA | Included in data analyses |
| RP329 | 39.880280 | -110.760320 | UTA | Included in data analyses |
| RP330 | 39.872700 | -110.817670 | UTA | Included in data analyses |
| RP331 | 40.313620 | -111.280250 | UTA | Included in data analyses |
| RP332 | 38.652450 | -111.946350 | UTA | Included in data analyses |
| RP333 | 38.096530 | -111.692250 | UTA | Included in data analyses |
| RP335 | 38.475130 | -111.460830 | UTA | Included in data analyses |
| RP337 | 37.945220 | -112.201850 | UTA | Included in data analyses |
| RP338 | 40.218930 | -111.250430 | UTA | Included in data analyses |
| RP339 | 37.984750 | -112.223980 | UTA | Included in data analyses |
| RP340 | 38.630220 | -111.979830 | UTA | Included in data analyses |
| RP342 | 37.944030 | -111.699530 | UTA | Included in data analyses |
| RP344 | 37.980120 | -111.724720 | UTA | Included in data analyses |
| RP345 | 38.070080 | -112.141700 | UTA | Included in data analyses |
| RP346 | 39.084830 | -111.339730 | UTA | Included in data analyses |
| RP347 | 39.080580 | -111.318780 | UTA | Included in data analyses |
| RP348 | 38.509300 | -111.496680 | UTA | Included in data analyses |
| RP349 | 38.814330 | -111.667250 | UTA | Included in data analyses |
| RP350 | 38.806530 | -111.689930 | UTA | Included in data analyses |
| RP352 | 37.928720 | -111.866180 | UTA | Included in data analyses |
| RP353 | 37.830530 | -111.882770 | UTA | Included in data analyses |
| RP354 | 40.537820 | -110.355750 | UTA | Included in data analyses |
| RP355 | 38.448200 | -111.449330 | UTA | Included in data analyses |
| RP356 | 38.626880 | -111.647320 | UTA | Included in data analyses |
| RP357 | 38.675020 | -111.943020 | UTA | Included in data analyses |
| RP358 | 37.959850 | -111.838320 | UTA | Included in data analyses |
| RP359 | 38.059770 | -111.591300 | UTA | Included in data analyses |
| RP360 | 38.532480 | -111.952630 | UTA | Included in data analyses |
| RP361 | 38.562730 | -111.967580 | UTA | Included in data analyses |
| RP362 | 38.550420 | -111.971520 | UTA | Included in data analyses |
| RP363 | 38.577000 | -111.945950 | UTA | Included in data analyses |
| RP364 | 38.591430 | -111.939600 | UTA | Included in data analyses |
| RP365 | 38.662600 | -112.275270 | UTA | Included in data analyses |
| RP366 | 40.294120 | -111.251300 | UTA | Included in data analyses |
| RP367 | 38.496280 | -111.458130 | UTA | Included in data analyses |

|       |           |             |     |                           |
|-------|-----------|-------------|-----|---------------------------|
| RP368 | 40.564980 | -110.504520 | UTA | Included in data analyses |
| RP369 | 40.554980 | -110.488730 | UTA | Included in data analyses |
| RP370 | 40.533780 | -110.464380 | UTA | Included in data analyses |
| RP372 | 38.752680 | -111.651880 | UTA | Included in data analyses |
| RP373 | 38.723950 | -111.678070 | UTA | Included in data analyses |
| RP374 | 39.812600 | -111.694570 | UTA | Included in data analyses |
| RP375 | 39.834480 | -111.722150 | UTA | Included in data analyses |
| RP376 | 39.842420 | -111.721770 | UTA | Included in data analyses |
| RP377 | 39.879080 | -111.685620 | UTA | Included in data analyses |
| RP378 | 39.919080 | -111.633620 | UTA | Included in data analyses |
| RP379 | 40.028280 | -111.258330 | UTA | Included in data analyses |
| RP380 | 38.696380 | -111.937900 | UTA | Included in data analyses |
| RP381 | 39.314100 | -111.366730 | UTA | Included in data analyses |
| RP382 | 38.679600 | -112.285850 | UTA | Included in data analyses |
| RP383 | 38.220570 | -112.414350 | UTA | Included in data analyses |
| RP384 | 38.066270 | -111.633380 | UTA | Included in data analyses |
| RP386 | 39.332150 | -111.433100 | UTA | Included in data analyses |
| RP387 | 39.319970 | -111.410320 | UTA | Included in data analyses |
| RP388 | 39.385000 | -111.387550 | UTA | Included in data analyses |
| RP389 | 39.305380 | -111.389820 | UTA | Included in data analyses |
| RP390 | 39.319180 | -111.473830 | UTA | Included in data analyses |
| RP391 | 39.906880 | -111.241650 | UTA | Included in data analyses |
| RP392 | 39.883330 | -111.263830 | UTA | Included in data analyses |
| RP393 | 39.864450 | -111.286530 | UTA | Included in data analyses |
| RP396 | 39.748900 | -111.323550 | UTA | Included in data analyses |
| RP398 | 39.986580 | -111.153970 | UTA | Included in data analyses |
| RP399 | 40.036370 | -111.200200 | UTA | Included in data analyses |
| RP400 | 40.585650 | -110.330550 | UTA | Included in data analyses |
| RP401 | 40.224070 | -111.228830 | UTA | Included in data analyses |
| RP402 | 38.609980 | -111.671650 | UTA | Included in data analyses |
| RP404 | 38.581400 | -111.478930 | UTA | Included in data analyses |
| RP405 | 38.254550 | -112.331970 | UTA | Included in data analyses |
| RP407 | 38.263850 | -112.380530 | UTA | Included in data analyses |
| RP408 | 38.225680 | -112.439420 | UTA | Included in data analyses |
| RP409 | 38.675050 | -111.662680 | UTA | Included in data analyses |
| RP410 | 40.919820 | -110.767530 | UTA | Included in data analyses |
| RP411 | 40.935570 | -110.704130 | UTA | Included in data analyses |
| RP413 | 40.950600 | -110.647350 | UTA | Included in data analyses |
| RP414 | 40.956930 | -110.675970 | UTA | Included in data analyses |
| RP415 | 40.929350 | -110.614980 | UTA | Included in data analyses |
| RP417 | 40.896700 | -110.662030 | UTA | Included in data analyses |
| RP418 | 40.947070 | -110.582900 | UTA | Included in data analyses |

|       |           |             |     |                           |
|-------|-----------|-------------|-----|---------------------------|
| RP419 | 40.932730 | -110.562520 | UTA | Included in data analyses |
| RP420 | 40.909980 | -110.548250 | UTA | Included in data analyses |
| RP421 | 40.956700 | -110.558850 | UTA | Included in data analyses |
| RP422 | 40.957070 | -110.503900 | UTA | Included in data analyses |
| RP423 | 40.953030 | -110.461350 | UTA | Included in data analyses |
| RP424 | 40.942930 | -110.417500 | UTA | Included in data analyses |
| RP425 | 40.923120 | -110.404980 | UTA | Included in data analyses |
| RP426 | 40.954520 | -110.392980 | UTA | Included in data analyses |
| RP427 | 41.000830 | -110.378100 | UTA | Included in data analyses |
| RP428 | 41.010830 | -110.356950 | UTA | Included in data analyses |
| RP429 | 40.981900 | -110.345420 | UTA | Included in data analyses |
| RP430 | 40.954280 | -110.317370 | UTA | Included in data analyses |
| RP432 | 37.972720 | -111.816700 | UTA | Included in data analyses |
| RP433 | 38.612550 | -111.967950 | UTA | Included in data analyses |
| RP434 | 38.051880 | -112.168050 | UTA | Included in data analyses |
| RP435 | 40.602000 | -110.347020 | UTA | Included in data analyses |
| RP453 | 44.992280 | -111.858130 | UTA | Included in data analyses |
| RP469 | 41.452220 | -111.504370 | UTA | Included in data analyses |
| RP470 | 41.417750 | -111.521330 | UTA | Included in data analyses |
| RP471 | 41.475320 | -111.483930 | UTA | Included in data analyses |
| RP635 | 40.929350 | -110.614980 | UTA | Included in data analyses |
| RP638 | 37.975267 | -112.217267 | UTA | Included in data analyses |
| RP645 | 39.825100 | -111.356450 | UTA | Included in data analyses |
| RP646 | 39.693330 | -111.328280 | UTA | Included in data analyses |
| RP647 | 38.455650 | -111.452630 | UTA | Included in data analyses |
| RP648 | 38.223500 | -112.376600 | UTA | Included in data analyses |
| RP668 | 38.014300 | -111.761620 | UTA | Included in data analyses |
| RP669 | 38.478780 | -111.459550 | UTA | Included in data analyses |
| RP670 | 37.999050 | -111.794770 | UTA | Included in data analyses |
| HZ041 | 45.033480 | -114.106450 | WES | Included in data analyses |
| HZ053 | 45.126580 | -114.136630 | WES | Included in data analyses |
| HZ088 | 44.443380 | -114.734130 | WES | Included in data analyses |
| HZ097 | 44.443380 | -114.734130 | WES | Included in data analyses |
| HZ102 | 44.457280 | -114.752880 | WES | Included in data analyses |
| HZ152 | 44.503000 | -114.753200 | WES | Included in data analyses |
| HZ365 | 45.114550 | -114.078250 | WES | Included in data analyses |
| HZ411 | 44.794300 | -114.258367 | WES | Included in data analyses |
| HZ422 | 44.832783 | -114.254700 | WES | Included in data analyses |
| HZ449 | 44.441583 | -114.733583 | WES | Included in data analyses |
| RP017 | 45.654400 | -113.786700 | WES | Included in data analyses |
| RP021 | 37.913000 | -119.257600 | WES | Included in data analyses |
| RP033 | 43.497000 | -110.954400 | WES | Included in data analyses |

|       |           |             |     |                           |
|-------|-----------|-------------|-----|---------------------------|
| RP037 | 44.406000 | -115.285800 | WES | Included in data analyses |
| RP041 | 44.965000 | -114.602100 | WES | Included in data analyses |
| RP046 | 44.366000 | -115.143500 | WES | Included in data analyses |
| RP053 | 44.288000 | -115.481300 | WES | Included in data analyses |
| RP070 | 45.710000 | -113.998100 | WES | Included in data analyses |
| RP072 | 45.705000 | -113.988700 | WES | Included in data analyses |
| RP074 | 45.703000 | -113.985200 | WES | Included in data analyses |
| RP076 | 44.941000 | -114.121100 | WES | Included in data analyses |
| RP089 | 45.200000 | -115.990200 | WES | Included in data analyses |
| RP092 | 44.912000 | -114.386600 | WES | Included in data analyses |
| RP098 | 44.444000 | -115.089300 | WES | Included in data analyses |
| RP105 | 44.604000 | -114.542400 | WES | Included in data analyses |
| RP106 | 45.720000 | -113.994200 | WES | Included in data analyses |
| RP109 | 45.547000 | -113.763200 | WES | Included in data analyses |
| RP114 | 45.336000 | -114.003900 | WES | Included in data analyses |
| RP115 | 45.141000 | -113.469500 | WES | Included in data analyses |
| RP120 | 45.125000 | -114.147200 | WES | Included in data analyses |
| RP122 | 44.841300 | -114.272300 | WES | Included in data analyses |
| RP126 | 44.865000 | -114.298000 | WES | Included in data analyses |
| RP128 | 45.115500 | -114.144200 | WES | Included in data analyses |
| RP130 | 45.534000 | -113.080000 | WES | Included in data analyses |
| RP131 | 38.051000 | -119.250200 | WES | Included in data analyses |
| RP137 | 44.968000 | -114.121000 | WES | Included in data analyses |
| RP147 | 44.475000 | -114.730700 | WES | Included in data analyses |
| RP148 | 48.706000 | -120.672200 | WES | Included in data analyses |
| RP149 | 43.768000 | -113.901400 | WES | Included in data analyses |
| RP150 | 45.679000 | -113.832800 | WES | Included in data analyses |
| RP154 | 36.449000 | -118.228900 | WES | Included in data analyses |
| RP161 | 46.268000 | -111.927500 | WES | Included in data analyses |
| RP167 | 44.416000 | -115.470300 | WES | Included in data analyses |
| RP174 | 45.156400 | -114.151700 | WES | Included in data analyses |
| RP183 | 44.855000 | -118.263800 | WES | Included in data analyses |
| RP188 | 44.807000 | -114.270600 | WES | Included in data analyses |
| RP192 | 44.411000 | -115.372000 | WES | Included in data analyses |
| RP193 | 44.795000 | -113.782200 | WES | Included in data analyses |
| RP200 | 44.296000 | -115.479900 | WES | Included in data analyses |
| RP202 | 45.118500 | -114.158400 | WES | Included in data analyses |
| RP210 | 44.834000 | -118.247700 | WES | Included in data analyses |
| RP223 | 44.370000 | -115.397000 | WES | Included in data analyses |
| RP224 | 45.442500 | -113.838400 | WES | Included in data analyses |
| RP225 | 45.095000 | -113.423300 | WES | Included in data analyses |
| RP227 | 44.479000 | -115.320400 | WES | Included in data analyses |

|       |           |             |     |                             |
|-------|-----------|-------------|-----|-----------------------------|
| RP230 | 44.503000 | -114.753200 | WES | Included in data analyses   |
| RP232 | 44.702500 | -114.315800 | WES | Included in data analyses   |
| RP233 | 45.602200 | -113.682500 | WES | Included in data analyses   |
| RP244 | 46.561000 | -112.303200 | WES | Included in data analyses   |
| RP249 | 44.840900 | -114.274200 | WES | Included in data analyses   |
| RP254 | 45.170000 | -113.520500 | WES | Included in data analyses   |
| RP263 | 45.569700 | -113.706500 | WES | Included in data analyses   |
| RP439 | 45.347120 | -111.529670 | WES | Included in data analyses   |
| RP445 | 45.458430 | -111.854370 | WES | Included in data analyses   |
| RP448 | 44.923220 | -111.359380 | WES | Included in data analyses   |
| RP450 | 45.125250 | -111.862000 | WES | Included in data analyses   |
| RP461 | 44.562700 | -112.143000 | WES | Included in data analyses   |
| RP462 | 44.541780 | -112.126520 | WES | Included in data analyses   |
| RP464 | 44.596780 | -111.536120 | WES | Included in data analyses   |
| RP468 | 44.485270 | -112.088370 | WES | Included in data analyses   |
| RP472 | 37.434480 | -118.747720 | WES | Included in data analyses   |
| RP473 | 37.431330 | -118.749470 | WES | Included in data analyses   |
| RP474 | 37.433970 | -118.748000 | WES | Included in data analyses   |
| RP475 | 37.743950 | -119.035770 | WES | Included in data analyses   |
| RP479 | 44.643680 | -113.531830 | WES | Included in data analyses   |
| RP480 | 44.608120 | -113.576270 | WES | Included in data analyses   |
| RP636 | 44.843450 | -114.272933 | WES | Included in data analyses   |
| RP641 | 44.886700 | -111.356280 | WES | Included in data analyses   |
| RP649 | 44.577030 | -113.472080 | WES | Included in data analyses   |
| XX044 | 38.838818 | -106.413099 | NA  | excluded from data analyses |
| RP597 | 37.394750 | -108.068800 | NA  | excluded from data analyses |
| XX063 | 37.984970 | -111.719630 | NA  | excluded from data analyses |
| RP180 | unknown   | unknown     | NA  | excluded from data analyses |
| XX004 | 38.813730 | -106.396570 | NA  | excluded from data analyses |
| RP182 | unknown   | unknown     | NA  | excluded from data analyses |
| RP467 | 44.411030 | -112.001280 | NA  | excluded from data analyses |
| RP198 | 44.421000 | -112.876000 | NA  | excluded from data analyses |
| RP018 | 44.453000 | -112.916300 | NA  | excluded from data analyses |
| RP442 | 44.464200 | -111.998530 | NA  | excluded from data analyses |
| RP466 | 44.490630 | -111.654570 | NA  | excluded from data analyses |
| RP441 | 44.493550 | -111.767300 | NA  | excluded from data analyses |
| RP084 | 44.523000 | -112.192500 | NA  | excluded from data analyses |
| RP215 | 44.556000 | -112.639000 | NA  | excluded from data analyses |
| RP463 | 44.569920 | -112.020600 | NA  | excluded from data analyses |
| RP465 | 44.601970 | -111.496800 | NA  | excluded from data analyses |
| RP444 | 44.675770 | -111.276980 | NA  | excluded from data analyses |
| RP459 | 44.862220 | -111.621930 | NA  | excluded from data analyses |

|        |           |             |    |                            |
|--------|-----------|-------------|----|----------------------------|
| RP457  | 44.884030 | -111.752620 | NA | excluded from data analyes |
| RP456  | 44.898120 | -111.780120 | NA | excluded from data analyes |
| XX064  | 44.956270 | -111.859980 | NA | excluded from data analyes |
| XX059  | 45.072133 | -114.085823 | NA | excluded from data analyes |
| RP449  | 45.141950 | -111.834970 | NA | excluded from data analyes |
| RP209  | 45.537000 | -113.829100 | NA | excluded from data analyes |
| RP211  | 45.541000 | -113.826500 | NA | excluded from data analyes |
| RP218  | 45.634000 | -112.925000 | NA | excluded from data analyes |
| RP097  | 45.853000 | -113.438500 | NA | excluded from data analyes |
| RP158  | 45.870000 | -113.226400 | NA | excluded from data analyes |
| RP270b | 44.300750 | -107.305780 | NA | excluded from data analyes |
| RP670b | 37.999050 | -111.794770 | NA | excluded from data analyes |
| RP669b | 38.478780 | -111.459550 | NA | excluded from data analyes |
| RP668b | 38.014300 | -111.761620 | NA | excluded from data analyes |
| RP365b | 38.662600 | -112.275270 | NA | excluded from data analyes |

---

NA, not applicable

**Table S2** Genotype accuracy estimated by comparing called SNPs to Sanger sequences

| SampleID | Alias*   | Latitude  | Longitude   | Mean depth | Identical genotypes | Different genotypes | False%   |
|----------|----------|-----------|-------------|------------|---------------------|---------------------|----------|
| RP072    | ID06_04  | 45.705000 | -113.988700 | 2.7544     | 413                 | 0                   | 0        |
| RP148    | WA26_17  | 48.706000 | -120.672200 | 3.1167     | 814                 | 2                   | 0.245098 |
| RP094    | ID73     | 44.754000 | -114.679400 | 3.0629     | 829                 | 1                   | 0.120482 |
| RP184    | ID87_44B | 43.839000 | -114.294700 | 3.0746     | 832                 | 0                   | 0        |
| RP109    | MT55     | 45.547000 | -113.763200 | 3.0754     | 868                 | 2                   | 0.229885 |
| RP010    | ID14_40B | 44.622000 | -114.496800 | 3.1079     | 875                 | 1                   | 0.114155 |
| RP165    | AZ01_06  | 36.406000 | -112.091700 | 3.0769     | 918                 | 5                   | 0.541712 |
| RP149    | ID116_3A | 43.768000 | -113.901400 | 3.0875     | 942                 | 3                   | 0.31746  |
| RP042    | CO22_01  | 40.001000 | -105.468100 | 3.271      | 942                 | 0                   | 0        |
| RP179    | ID120_1B | 44.791000 | -113.312600 | 3.2684     | 956                 | 1                   | 0.104493 |
| RP073    | CO21_12  | 39.951000 | -105.593600 | 3.1889     | 1018                | 2                   | 0.196078 |
| RP181    | UT05_09  | 37.612000 | -112.830300 | 3.2535     | 1042                | 1                   | 0.095877 |
| RP032    | CO27_05  | 40.399630 | -106.119000 | 3.3152     | 1083                | 0                   | 0        |
| RP139    | CO29_01  | 40.544000 | -106.625000 | 3.4399     | 1122                | 1                   | 0.089047 |
| RP213    | MT51     | 44.536000 | -112.618000 | 3.4841     | 1176                | 1                   | 0.084962 |
| RP067    | SAD12    | 38.707000 | -106.804500 | 3.6365     | 1202                | 0                   | 0        |
| RP125    | CO16_03  | 39.684000 | -105.607100 | 3.4356     | 1238                | 0                   | 0        |
| RP154    | CA24_11  | 36.449000 | -118.228900 | 4.4723     | 1331                | 0                   | 0        |
| RP197    | ID86_25A | 44.348000 | -113.476100 | 3.786      | 1351                | 1                   | 0.073964 |
| RP152    | CO18_4   | 39.864000 | -105.444700 | 3.8295     | 1363                | 1                   | 0.073314 |
| RP195    | UT07_05  | 37.807600 | -109.818700 | 5.869      | 1765                | 2                   | 0.113186 |
| Average  |          |           |             |            |                     |                     | 0.114272 |

\*Sample name in Song et al. (2009)

Length of sanger sequences is 69559 bp; Number of SNPs is 1909.



**Table S3** Comparison of summary statistics (mean  $\pm$  standard error) between  $F_{ST}$ -islands and the rest of the genome for all group-pairs.  $P$ -values were estimated by randomization test with 100,000 permutations.

| Parameter <sup>a</sup>                    | Genomic Islands        | Genomic background    | $P$ -value           |
|-------------------------------------------|------------------------|-----------------------|----------------------|
| <b>COL vs. NOR (<math>N = 306</math>)</b> |                        |                       |                      |
| $d_{XY}$                                  | 2.731 $\pm$ 0.127      | 1.583 $\pm$ 0.013     | $< 1 \times 10^{-5}$ |
| Fay & Wu's $H$ (COL)                      | -0.209 $\pm$ 0.013     | -0.15 $\pm$ 0.003     | $< 1 \times 10^{-5}$ |
| Fay & Wu's $H$ (NOR)                      | -0.961 $\pm$ 0.033     | -0.628 $\pm$ 0.007    | $< 1 \times 10^{-5}$ |
| $F_{ST}$                                  | 0.559 $\pm$ 0.005      | 0.206 $\pm$ 0.001     | NA                   |
| Gene density                              | 4431.905 $\pm$ 203.435 | 4540.454 $\pm$ 35.251 | 0.5277               |
| Recombination rate (COL)                  | 0.545 $\pm$ 0.031      | 0.636 $\pm$ 0.007     | 0.0076               |
| Recombination rate (NOR)                  | 0.291 $\pm$ 0.046      | 0.254 $\pm$ 0.006     | 0.2128               |
| RND                                       | 0.191 $\pm$ 0.009      | 0.116 $\pm$ 0.001     | $< 1 \times 10^{-5}$ |
| Scaled $\pi$ (COL)                        | 0.124 $\pm$ 0.005      | 0.14 $\pm$ 0.001      | 0.0046               |
| Scaled $\pi$ (NOR)                        | 0.064 $\pm$ 0.004      | 0.08 $\pm$ 0.001      | 9.00E-04             |
| Tajima's $D$ (COL)                        | -1.062 $\pm$ 0.044     | -0.941 $\pm$ 0.008    | 0.0025               |
| Tajima's $D$ (NOR)                        | -0.949 $\pm$ 0.056     | -0.393 $\pm$ 0.014    | $< 1 \times 10^{-5}$ |
| $\pi$ (COL)                               | 1.682 $\pm$ 0.066      | 1.893 $\pm$ 0.016     | 0.0055               |
| $\pi$ (NOR)                               | 0.901 $\pm$ 0.055      | 1.084 $\pm$ 0.013     | 0.0026               |
| <b>COL vs. UTA (<math>N = 349</math>)</b> |                        |                       |                      |
| $d_{XY}$                                  | 2.278 $\pm$ 0.086      | 1.8 $\pm$ 0.015       | $< 1 \times 10^{-3}$ |
| Fay & Wu's $H$ (COL)                      | -0.138 $\pm$ 0.01      | -0.15 $\pm$ 0.003     | 0.3284               |
| Fay & Wu's $H$ (UTA)                      | -0.37 $\pm$ 0.017      | -0.273 $\pm$ 0.004    | $< 1 \times 10^{-5}$ |
| $F_{ST}$                                  | 0.385 $\pm$ 0.004      | 0.124 $\pm$ 0.001     | NA                   |
| Gene density                              | 4611 $\pm$ 154.357     | 4450.138 $\pm$ 35.599 | 0.3141               |
| Recombination rate (COL)                  | 0.624 $\pm$ 0.036      | 0.614 $\pm$ 0.007     | 0.7536               |
| Recombination rate (UTA)                  | 0.718 $\pm$ 0.043      | 0.901 $\pm$ 0.013     | 0.0026               |
| RND                                       | 0.159 $\pm$ 0.006      | 0.126 $\pm$ 0.001     | $< 1 \times 10^{-5}$ |
| Scaled $\pi$ (COL)                        | 0.127 $\pm$ 0.004      | 0.142 $\pm$ 0.001     | 0.02                 |
| Scaled $\pi$ (UTA)                        | 0.11 $\pm$ 0.005       | 0.138 $\pm$ 0.001     | $2 \times 10^{-4}$   |
| Tajima's $D$ (COL)                        | -0.934 $\pm$ 0.037     | -0.942 $\pm$ 0.008    | 0.8425               |
| Tajima's $D$ (UTA)                        | -1.349 $\pm$ 0.047     | -1.138 $\pm$ 0.009    | $< 1 \times 10^{-5}$ |
| $\pi$ (COL)                               | 1.692 $\pm$ 0.059      | 1.924 $\pm$ 0.017     | 0.0017               |
| $\pi$ (UTA)                               | 1.52 $\pm$ 0.074       | 1.925 $\pm$ 0.02      | $< 1 \times 10^{-5}$ |
| <b>UTA vs. NOR (<math>N = 352</math>)</b> |                        |                       |                      |
| $d_{XY}$                                  | 2.522 $\pm$ 0.119      | 1.464 $\pm$ 0.014     | $< 1 \times 10^{-3}$ |
| Fay & Wu's $H$ (UTA)                      | -0.315 $\pm$ 0.017     | -0.274 $\pm$ 0.004    | 0.0179               |
| Fay & Wu's $H$ (NOR)                      | -0.896 $\pm$ 0.028     | -0.629 $\pm$ 0.007    | $< 1 \times 10^{-5}$ |
| $F_{ST}$                                  | 0.483 $\pm$ 0.004      | 0.152 $\pm$ 0.001     | NA                   |
| Gene density                              | 4160.366 $\pm$ 148.297 | 4551.862 $\pm$ 35.847 | 0.0151               |
| Recombination rate (UTA)                  | 0.735 $\pm$ 0.045      | 0.891 $\pm$ 0.013     | 0.0078               |
| Recombination rate (NOR)                  | 0.191 $\pm$ 0.018      | 0.247 $\pm$ 0.006     | 0.0293               |
| RND                                       | 0.165 $\pm$ 0.007      | 0.105 $\pm$ 0.001     | $< 1 \times 10^{-5}$ |
| Scaled $\pi$ (UTA)                        | 0.122 $\pm$ 0.005      | 0.135 $\pm$ 0.001     | 0.0228               |
| Scaled $\pi$ (NOR)                        | 0.066 $\pm$ 0.004      | 0.08 $\pm$ 0.001      | $8 \times 10^{-4}$   |
| Tajima's $D$ (UTA)                        | -1.122 $\pm$ 0.046     | -1.158 $\pm$ 0.01     | 0.393                |
| Tajima's $D$ (NOR)                        | -0.714 $\pm$ 0.056     | -0.402 $\pm$ 0.014    | $< 1 \times 10^{-5}$ |
| $\pi$ (UTA)                               | 1.821 $\pm$ 0.084      | 1.873 $\pm$ 0.019     | 0.5347               |
| $\pi$ (NOR)                               | 0.933 $\pm$ 0.051      | 1.086 $\pm$ 0.013     | 0.0067               |
| <b>WES vs. COL (<math>N = 163</math>)</b> |                        |                       |                      |
| $d_{XY}$                                  | 4.225 $\pm$ 0.187      | 2.45 $\pm$ 0.016      | $< 1 \times 10^{-3}$ |
| Fay & Wu's $H$ (WES)                      | -1.243 $\pm$ 0.041     | -0.895 $\pm$ 0.006    | $< 1 \times 10^{-5}$ |
| Fay & Wu's $H$ (COL)                      | -0.288 $\pm$ 0.024     | -0.149 $\pm$ 0.003    | $< 1 \times 10^{-5}$ |

|                             |                    |                   |                        |
|-----------------------------|--------------------|-------------------|------------------------|
| $F_{ST}$                    | 0.777 ± 0.003      | 0.429 ± 0.002     | NA                     |
| Gene density                | 4620.374 ± 316.101 | 4481.933 ± 34.787 | 0.544                  |
| Recombination rate (WES)    | 0.422 ± 0.036      | 0.549 ± 0.009     | 0.0293                 |
| Recombination rate (COL)    | 0.668 ± 0.072      | 1.037 ± 0.012     | < 1 x 10 <sup>-5</sup> |
| RND                         | 0.307 ± 0.014      | 0.176 ± 0.001     | < 1 x 10 <sup>-5</sup> |
| Scaled $\pi$ (WES)          | 0.092 ± 0.006      | 0.098 ± 0.001     | 0.3426                 |
| Scaled $\pi$ (COL)          | 0.083 ± 0.004      | 0.141 ± 0.001     | < 1 x 10 <sup>-5</sup> |
| Tajima's $D$ (WES)          | -1.119 ± 0.042     | -0.783 ± 0.01     | < 1 x 10 <sup>-5</sup> |
| Tajima's $D$ (COL)          | -1.567 ± 0.049     | -0.928 ± 0.008    | < 1 x 10 <sup>-5</sup> |
| $\pi$ (WES)                 | 1.162 ± 0.056      | 1.315 ± 0.013     | 0.0772                 |
| $\pi$ (COL)                 | 1.083 ± 0.053      | 1.921 ± 0.016     | < 1 x 10 <sup>-5</sup> |
| <b>WES vs. NOR (N = 22)</b> |                    |                   |                        |
| $d_{XY}$                    | 5.011 ± 0.578      | 2.27 ± 0.016      | < 1 x 10 <sup>-5</sup> |
| Fay & Wu's $H$ (WES)        | -1.629 ± 0.112     | -0.898 ± 0.006    | < 1 x 10 <sup>-5</sup> |
| Fay & Wu's $H$ (NOR)        | -1.441 ± 0.176     | -0.628 ± 0.007    | < 1 x 10 <sup>-5</sup> |
| $F_{ST}$                    | 0.901 ± 0.004      | 0.555 ± 0.002     | NA                     |
| Gene density                | 3934.045 ± 618.685 | 4543.327 ± 34.975 | 0.3144                 |
| Recombination rate (WES)    | 0.379 ± 0.06       | 0.554 ± 0.009     | 0.2464                 |
| Recombination rate (NOR)    | 0.123 ± 0.04       | 0.418 ± 0.009     | 0.0631                 |
| RND                         | 0.391 ± 0.059      | 0.164 ± 0.001     | < 1 x 10 <sup>-5</sup> |
| Scaled $\pi$ (WES)          | 0.07 ± 0.007       | 0.097 ± 0.001     | 0.1002                 |
| Scaled $\pi$ (NOR)          | 0.03 ± 0.007       | 0.08 ± 0.001      | 0.0061                 |
| Tajima's $D$ (WES)          | -1.48 ± 0.053      | -0.789 ± 0.01     | 5 x 10 <sup>-4</sup>   |
| Tajima's $D$ (NOR)          | -1.926 ± 0.125     | -0.413 ± 0.013    | < 1 x 10 <sup>-5</sup> |
| $\pi$ (WES)                 | 0.94 ± 0.094       | 1.298 ± 0.013     | 0.1062                 |
| $\pi$ (NOR)                 | 0.322 ± 0.032      | 1.073 ± 0.012     | 0.0049                 |
| <b>WES vs. UTA (N = 85)</b> |                    |                   |                        |
| $d_{XY}$                    | 5.423 ± 0.363      | 2.728 ± 0.019     | < 1 x 10 <sup>-5</sup> |
| Fay & Wu's $H$ (WES)        | -1.319 ± 0.053     | -0.895 ± 0.006    | < 1 x 10 <sup>-5</sup> |
| Fay & Wu's $H$ (UTA)        | -0.576 ± 0.049     | -0.273 ± 0.004    | < 1 x 10 <sup>-5</sup> |
| $F_{ST}$                    | 0.843 ± 0.003      | 0.489 ± 0.002     | NA                     |
| Gene density                | 4621.494 ± 309.24  | 4476.191 ± 34.985 | 0.639                  |
| Recombination rate (WES)    | 0.43 ± 0.059       | 0.549 ± 0.009     | 0.1457                 |
| Recombination rate (UTA)    | 1.074 ± 0.19       | 1.487 ± 0.022     | 0.0438                 |
| RND                         | 0.364 ± 0.022      | 0.19 ± 0.001      | < 1 x 10 <sup>-5</sup> |
| Scaled $\pi$ (WES)          | 0.094 ± 0.008      | 0.098 ± 0.001     | 0.633                  |
| Scaled $\pi$ (UTA)          | 0.059 ± 0.005      | 0.138 ± 0.001     | < 1 x 10 <sup>-5</sup> |
| Tajima's $D$ (WES)          | -1.034 ± 0.055     | -0.788 ± 0.01     | 0.0075                 |
| Tajima's $D$ (UTA)          | -2.026 ± 0.05      | -1.139 ± 0.009    | < 1 x 10 <sup>-5</sup> |
| $\pi$ (WES)                 | 1.268 ± 0.094      | 1.313 ± 0.013     | 0.7003                 |
| $\pi$ (UTA)                 | 0.826 ± 0.063      | 1.909 ± 0.019     | < 1 x 10 <sup>-5</sup> |

<sup>a</sup> $d_{XY}$  and  $\pi$  are in unit of 10<sup>-3</sup>, recombination rate ( $\rho/\pi$ ) is scaled by diversity, and gene density is total length of coding regions (bp) per 20-kb window.

$N_o$ , number of outlier windows.

NA, not test for the extreme of  $F_{ST}$  distribution ( $F_{ST}$ -islands) to the rest of the distribution.

**Table S4** Patterns of isolation by distance in *B. stricta* groups.

| Group/species | No. of genotypes | Mantel test |          | Ratio of increased diversity per 100 km (%) |                |
|---------------|------------------|-------------|----------|---------------------------------------------|----------------|
|               |                  | <i>r</i>    | <i>P</i> | Mean                                        | Standard error |
| NOR           | 105              | 0.33        | 0.0001   | 18.58                                       | 3.53           |
| UTA           | 126              | 0.23        | 0.0001   | 10.42                                       | 2.23           |
| COL           | 157              | 0.19        | 0.0023   | 3.36                                        | 2.69           |
| WES           | 69               | 0.36        | 0.0003   | 11.95                                       | 8.34           |

**Table S5** Relative likelihood of the different models shown in Fig. S3

| Model    | No. of parameters | $\log_{10}(\text{Likelihood})^a$ | $\text{AIC}_i^b$ | $\Delta_i^b$ | Model normalized<br>relative likelihood ( $W_i^b$ ) |
|----------|-------------------|----------------------------------|------------------|--------------|-----------------------------------------------------|
| Model 1  | 28                | -19801333.66                     | 39602723.32      | 223700.48    | 0                                                   |
| Model 2  | 10                | -20104883.06                     | 40209786.12      | 830763.282   | 0                                                   |
| Model 3  | 32                | -19737204.31                     | 39474472.61      | 95449.772    | 0                                                   |
| Model 4  | 14                | -20058425.26                     | 40116878.52      | 737855.68    | 0                                                   |
| Model 5  | 33                | -19694093.3                      | 39388252.59      | 9229.754     | 0                                                   |
| Model 6  | 15                | -20049950.39                     | 40099930.78      | 720907.942   | 0                                                   |
| Model 7  | 31                | -19707142.23                     | 39414346.46      | 35323.616    | 0                                                   |
| Model 8  | 13                | -20057749.75                     | 40115525.51      | 736502.668   | 0                                                   |
| Model 9  | 34                | -19693885.26                     | 39387838.53      | 8815.686     | 0                                                   |
| Model 10 | 16                | -20052991.34                     | 40106014.68      | 726991.838   | 0                                                   |
| Model 11 | 38                | -19689473.42                     | 39379022.84      | 0            | 1                                                   |
| Model 12 | 20                | -20048580.62                     | 40097201.24      | 718178.398   | 0                                                   |
| Model 13 | 38                | -19689729.41                     | 39379534.82      | 511.976      | 6.6961E-112                                         |
| Model 14 | 20                | -20047807.53                     | 40095655.06      | 716632.22    | 0                                                   |

<sup>a</sup>The highest likelihood value among the 50 independent runs for each model.

<sup>b</sup>The calculation of  $\text{AIC}_i$ ,  $\Delta_i$  and  $w_i$  are according to the methods shown in Excoffier et al. (2013).

**Table S6** Maximum likelihood estimates and 95% confidence interval of parameters in the best-fit model (Model 11) inferred by fastsimcoal2.

| Parameters                | Point estimate | 2.5% Percentile | 97.5% Percentile |
|---------------------------|----------------|-----------------|------------------|
| $N_{WES}$                 | 795.99         | 793.51          | 1086.57          |
| $N_{COL}$                 | 1112.16        | 990.07          | 1277.61          |
| $N_{UTA}$                 | 500.47         | 461.11          | 1466.66          |
| $N_{NOR}$                 | 132.38         | 111.14          | 158.65           |
| $N_{WES\_bot}$            | 203.14         | 202.38          | 560.71           |
| $N_{COL\_bot}$            | 270.22         | 237.32          | 404.77           |
| $N_{UTA\_bot}$            | 487.66         | 270.39          | 644.13           |
| $N_{NOR\_bot}$            | 13.62          | 10.28           | 21.77            |
| $N_{WES\_sta}$            | 18.64          | 17.89           | 19.75            |
| $N_{COL\_sta}$            | 100.49         | 99.95           | 105.26           |
| $N_{UTA\_sta}$            | 107.57         | 104.37          | 132.77           |
| $N_{NOR\_sta}$            | 11.46          | 10.46           | 12.91            |
| $N_{ANC}$                 | 24.20          | 22.74           | 31.50            |
| $N_{ANC\_CUN}$            | 35.82          | 33.67           | 41.37            |
| $N_{ANC\_UN}$             | 38.83          | 29.70           | 44.23            |
| $T_S$                     | 12.08          | 11.28           | 12.31            |
| $T_{EXP}$                 | 7.69           | 4.98            | 9.68             |
| $T_{DIV0}$                | 29.99          | 28.28           | 30.98            |
| $T_{DIV1}$                | 68.54          | 65.02           | 72.92            |
| $T_{DIV2}$                | 179.33         | 154.64          | 185.41           |
| $M_{WES \rightarrow COL}$ | 3.20E-06       | 2.37E-06        | 3.75E-06         |
| $M_{WES \rightarrow UTA}$ | 4.06E-06       | 2.55E-06        | 5.75E-06         |
| $M_{WES \rightarrow NOR}$ | 2.94E-06       | 2.01E-06        | 3.82E-06         |
| $M_{COL \rightarrow WES}$ | 4.80E-07       | 4.37E-07        | 5.83E-07         |
| $M_{COL \rightarrow UTA}$ | 1.01E-05       | 9.27E-06        | 1.06E-05         |
| $M_{COL \rightarrow NOR}$ | 8.79E-07       | 3.85E-07        | 9.83E-07         |
| $M_{UTA \rightarrow WES}$ | 3.76E-07       | 2.69E-07        | 4.59E-07         |
| $M_{UTA \rightarrow COL}$ | 1.03E-05       | 9.53E-06        | 1.09E-05         |
| $M_{UTA \rightarrow NOR}$ | 4.11E-06       | 3.38E-06        | 4.64E-06         |
| $M_{NOR \rightarrow WES}$ | 4.64E-06       | 4.32E-06        | 5.17E-06         |
| $M_{NOR \rightarrow COL}$ | 8.94E-06       | 7.54E-06        | 9.58E-06         |
| $M_{NOR \rightarrow UTA}$ | 1.95E-05       | 1.74E-05        | 2.12E-05         |
| $M_{WES \rightarrow UN}$  | 6.84E-10       | 5.78E-10        | 9.20E-10         |
| $M_{UN \rightarrow WES}$  | 1.65E-07       | 1.35E-07        | 8.49E-07         |
| $M_{COL \rightarrow UN}$  | 3.19E-07       | 1.57E-07        | 8.99E-07         |
| $M_{UN \rightarrow COL}$  | 1.75E-05       | 8.82E-06        | 3.08E-05         |
| $M_{WES \rightarrow CUN}$ | 7.09E-09       | 1.92E-09        | 9.86E-09         |
| $M_{CUN \rightarrow WES}$ | 6.91E-06       | 4.43E-06        | 7.56E-06         |

Parameter tags corresponding to the model shown in Fig. S4.

Parameters with N denote effective population sizes of current and ancestral populations, with T time estimates of divergence ( $T_{DIV0}$ ,  $T_{DIV1}$  and  $T_{DIV2}$ ) and population expansion ( $T_{EXP}$ ), with M migration between groups.

$T_S$  is time of instantaneous size change.

Estimates of effective population size and time are scaled by  $10^3$  individuals and thousand year ago (KYA), respectively.

Gene flow estimated between groups is given in migration rate per generation.

**Table S7** Nucleotide diversity ( $\pi$ , mean  $\pm$  standard error, in unit of  $10^{-3}$ ) in different genomic regions, and number and size of genomic islands in each group.

| Group | Genomic background | All islands       | Shared islands     | No. of 20-kb outliers |
|-------|--------------------|-------------------|--------------------|-----------------------|
| COL   | $1.807 \pm 0.012$  | $7.84 \pm 0.123$  | $8.939 \pm 0.211$  | 310                   |
| NOR   | $1.014 \pm 0.009$  | $6.037 \pm 0.111$ | $7.195 \pm 0.183$  | 315                   |
| UTA   | $1.791 \pm 0.014$  | $9.025 \pm 0.142$ | $10.126 \pm 0.233$ | 307                   |
| WES   | $1.240 \pm 0.009$  | $6.442 \pm 0.103$ | $7.553 \pm 0.186$  | 345                   |

**Table S8** Number/ratio of 20-kb high diversity outlier windows and NBS-LRR genes in three genomic regions.

|       | Outliers in WES | Outlier in COL | Outlier in UTA | Outlier in NOR | Shared outliers | LRR-NBS  |
|-------|-----------------|----------------|----------------|----------------|-----------------|----------|
| LG1p  | 101/0.293       | 81/0.261       | 84/0.274       | 92/0.292       | 53/0.41         | 132/0.35 |
| LG5p  | 28/0.081        | 27/0.087       | 26/0.085       | 31/0.098       | 17/0.13         | 49/0.13  |
| LG7p  | 54/0.157        | 35/0.113       | 39/0.127       | 33/0.105       | 21/0.16         | 46/0.12  |
| Total | 183/0.53        | 143/0.461      | 149/0.485      | 156/0.495      | 91/0.70         | 227/0.60 |

NOTE, ratio = number of outlier windows or LRR-NBS genes in each genomic region divided by total number of outliers or LRR-NBS genes.

**Table S9** Comparison of summary statistics (mean  $\pm$  standard error) between the three genomic regions and the genomic background. *P*-values were estimated by randomization test with 100,000 permutations.

| Parameter <sup>a</sup>    | With outliers          | Without outliers       | Background            | <i>P</i> -value (with outliers) | <i>P</i> -value (without outliers) |
|---------------------------|------------------------|------------------------|-----------------------|---------------------------------|------------------------------------|
| <b>LG1p</b>               |                        |                        |                       |                                 |                                    |
| $\pi$ (COL)               | 4.789 $\pm$ 0.168      | 3.183 $\pm$ 0.086      | 1.743 $\pm$ 0.011     | < 1 x 10 <sup>-5</sup>          | < 1 x 10 <sup>-5</sup>             |
| $\pi$ (NOR)               | 3.743 $\pm$ 0.161      | 2.119 $\pm$ 0.066      | 0.965 $\pm$ 0.008     | < 1 x 10 <sup>-5</sup>          | < 1 x 10 <sup>-5</sup>             |
| $\pi$ (UTA)               | 5.415 $\pm$ 0.205      | 3.438 $\pm$ 0.109      | 1.707 $\pm$ 0.013     | < 1 x 10 <sup>-5</sup>          | < 1 x 10 <sup>-5</sup>             |
| $\pi$ (WES)               | 4.204 $\pm$ 0.167      | 2.425 $\pm$ 0.077      | 1.185 $\pm$ 0.009     | < 1 x 10 <sup>-5</sup>          | < 1 x 10 <sup>-5</sup>             |
| Scaled $\pi$ (COL)        | 0.37 $\pm$ 0.019       | 0.236 $\pm$ 0.011      | 0.131 $\pm$ 0.001     | < 1 x 10 <sup>-5</sup>          | < 1 x 10 <sup>-5</sup>             |
| Scaled $\pi$ (NOR)        | 0.301 $\pm$ 0.019      | 0.152 $\pm$ 0.007      | 0.073 $\pm$ 0.001     | < 1 x 10 <sup>-5</sup>          | < 1 x 10 <sup>-5</sup>             |
| Scaled $\pi$ (UTA)        | 0.404 $\pm$ 0.021      | 0.248 $\pm$ 0.012      | 0.126 $\pm$ 0.001     | < 1 x 10 <sup>-5</sup>          | < 1 x 10 <sup>-5</sup>             |
| Scaled $\pi$ (WES)        | 0.32 $\pm$ 0.016       | 0.169 $\pm$ 0.007      | 0.09 $\pm$ 0.001      | < 1 x 10 <sup>-5</sup>          | < 1 x 10 <sup>-5</sup>             |
| Tajima's <i>D</i> (COL)   | -0.469 $\pm$ 0.042     | -0.666 $\pm$ 0.044     | -0.987 $\pm$ 0.007    | < 1 x 10 <sup>-5</sup>          | < 1 x 10 <sup>-5</sup>             |
| Tajima's <i>D</i> (NOR)   | 0.153 $\pm$ 0.06       | -0.083 $\pm$ 0.07      | -0.456 $\pm$ 0.013    | < 1 x 10 <sup>-5</sup>          | < 1 x 10 <sup>-5</sup>             |
| Tajima's <i>D</i> (UTA)   | -0.631 $\pm$ 0.044     | -0.832 $\pm$ 0.046     | -1.2 $\pm$ 0.009      | < 1 x 10 <sup>-5</sup>          | < 1 x 10 <sup>-5</sup>             |
| Tajima's <i>D</i> (WES)   | -0.13 $\pm$ 0.05       | -0.41 $\pm$ 0.054      | -0.835 $\pm$ 0.009    | < 1 x 10 <sup>-5</sup>          | < 1 x 10 <sup>-5</sup>             |
| Fay & Wu's <i>H</i> (COL) | -0.148 $\pm$ 0.016     | -0.178 $\pm$ 0.02      | -0.15 $\pm$ 0.003     | 0.8878                          | 0.0905                             |
| Fay & Wu's <i>H</i> (NOR) | -0.39 $\pm$ 0.033      | -0.521 $\pm$ 0.041     | -0.635 $\pm$ 0.007    | < 1 x 10 <sup>-5</sup>          | 0.0103                             |
| Fay & Wu's <i>H</i> (UTA) | -0.268 $\pm$ 0.025     | -0.359 $\pm$ 0.032     | -0.276 $\pm$ 0.004    | 0.6731                          | 8 x 10 <sup>-4</sup>               |
| Fay & Wu's <i>H</i> (WES) | -0.445 $\pm$ 0.031     | -0.562 $\pm$ 0.033     | -0.912 $\pm$ 0.006    | < 1 x 10 <sup>-5</sup>          | < 1 x 10 <sup>-5</sup>             |
| Gene density              | 3928.015 $\pm$ 163.988 | 3687.723 $\pm$ 178.187 | 4560.753 $\pm$ 35.436 | 5 x 10 <sup>-4</sup>            | 1 x 10 <sup>-4</sup>               |
| $d_{XY}$ (COL vs. NOR)    | 4.025 $\pm$ 0.139      | 2.474 $\pm$ 0.067      | 1.472 $\pm$ 0.009     | < 1 x 10 <sup>-5</sup>          | < 1 x 10 <sup>-5</sup>             |
| $d_{XY}$ (COL vs. UTA)    | 4.381 $\pm$ 0.151      | 2.661 $\pm$ 0.079      | 1.622 $\pm$ 0.01      | < 1 x 10 <sup>-5</sup>          | < 1 x 10 <sup>-5</sup>             |
| $d_{XY}$ (UTA vs. NOR)    | 4.227 $\pm$ 0.155      | 2.479 $\pm$ 0.075      | 1.338 $\pm$ 0.009     | < 1 x 10 <sup>-5</sup>          | < 1 x 10 <sup>-5</sup>             |
| $d_{XY}$ (WES vs. COL)    | 4.858 $\pm$ 0.156      | 3.213 $\pm$ 0.097      | 2.31 $\pm$ 0.013      | < 1 x 10 <sup>-5</sup>          | < 1 x 10 <sup>-5</sup>             |
| $d_{XY}$ (WES vs. NOR)    | 4.416 $\pm$ 0.143      | 2.846 $\pm$ 0.086      | 2.125 $\pm$ 0.012     | < 1 x 10 <sup>-5</sup>          | < 1 x 10 <sup>-5</sup>             |
| $d_{XY}$ (WES vs. UTA)    | 5.393 $\pm$ 0.169      | 3.512 $\pm$ 0.103      | 2.537 $\pm$ 0.014     | < 1 x 10 <sup>-5</sup>          | < 1 x 10 <sup>-5</sup>             |
| RND (COL vs. NOR)         | 0.301 $\pm$ 0.015      | 0.161 $\pm$ 0.007      | 0.106 $\pm$ 0.001     | < 1 x 10 <sup>-5</sup>          | < 1 x 10 <sup>-5</sup>             |
| RND (COL vs. UTA)         | 0.316 $\pm$ 0.015      | 0.168 $\pm$ 0.007      | 0.114 $\pm$ 0.001     | < 1 x 10 <sup>-5</sup>          | < 1 x 10 <sup>-5</sup>             |
| RND (UTA vs. NOR)         | 0.311 $\pm$ 0.016      | 0.16 $\pm$ 0.007       | 0.094 $\pm$ 0.001     | < 1 x 10 <sup>-5</sup>          | < 1 x 10 <sup>-5</sup>             |
| RND (WES vs. COL)         | 0.356 $\pm$ 0.015      | 0.208 $\pm$ 0.009      | 0.166 $\pm$ 0.001     | < 1 x 10 <sup>-5</sup>          | < 1 x 10 <sup>-5</sup>             |
| RND (WES vs. NOR)         | 0.328 $\pm$ 0.015      | 0.187 $\pm$ 0.008      | 0.155 $\pm$ 0.001     | < 1 x 10 <sup>-5</sup>          | 1 x 10 <sup>-4</sup>               |
| RND (WES vs. UTA)         | 0.382 $\pm$ 0.016      | 0.222 $\pm$ 0.009      | 0.178 $\pm$ 0.001     | < 1 x 10 <sup>-5</sup>          | < 1 x 10 <sup>-5</sup>             |
| $F_{ST}$ (COL vs. NOR)    | 0.163 $\pm$ 0.006      | 0.173 $\pm$ 0.008      | 0.223 $\pm$ 0.001     | < 1 x 10 <sup>-5</sup>          | < 1 x 10 <sup>-5</sup>             |
| $F_{ST}$ (COL vs. UTA)    | 0.084 $\pm$ 0.004      | 0.091 $\pm$ 0.005      | 0.138 $\pm$ 0.001     | < 1 x 10 <sup>-5</sup>          | < 1 x 10 <sup>-5</sup>             |
| $F_{ST}$ (UTA vs. NOR)    | 0.13 $\pm$ 0.005       | 0.14 $\pm$ 0.007       | 0.169 $\pm$ 0.001     | < 1 x 10 <sup>-5</sup>          | 0.0035                             |
| $F_{ST}$ (WES vs. COL)    | 0.259 $\pm$ 0.009      | 0.305 $\pm$ 0.011      | 0.445 $\pm$ 0.002     | < 1 x 10 <sup>-5</sup>          | < 1 x 10 <sup>-5</sup>             |
| $F_{ST}$ (WES vs. NOR)    | 0.274 $\pm$ 0.01       | 0.328 $\pm$ 0.013      | 0.566 $\pm$ 0.002     | < 1 x 10 <sup>-5</sup>          | < 1 x 10 <sup>-5</sup>             |
| $F_{ST}$ (WES vs. UTA)    | 0.269 $\pm$ 0.009      | 0.329 $\pm$ 0.011      | 0.504 $\pm$ 0.002     | < 1 x 10 <sup>-5</sup>          | < 1 x 10 <sup>-5</sup>             |
| <b>LG5p</b>               |                        |                        |                       |                                 |                                    |
| $\pi$ (COL)               | 4.472 $\pm$ 0.288      | 3.016 $\pm$ 0.148      | 1.743 $\pm$ 0.011     | < 1 x 10 <sup>-5</sup>          | < 1 x 10 <sup>-5</sup>             |
| $\pi$ (NOR)               | 3.41 $\pm$ 0.249       | 1.982 $\pm$ 0.143      | 0.965 $\pm$ 0.008     | < 1 x 10 <sup>-5</sup>          | < 1 x 10 <sup>-5</sup>             |
| $\pi$ (UTA)               | 5.331 $\pm$ 0.333      | 3.667 $\pm$ 0.193      | 1.707 $\pm$ 0.013     | < 1 x 10 <sup>-5</sup>          | < 1 x 10 <sup>-5</sup>             |
| $\pi$ (WES)               | 3.941 $\pm$ 0.253      | 2.531 $\pm$ 0.127      | 1.185 $\pm$ 0.009     | < 1 x 10 <sup>-5</sup>          | < 1 x 10 <sup>-5</sup>             |
| Scaled $\pi$ (COL)        | 0.328 $\pm$ 0.026      | 0.21 $\pm$ 0.013       | 0.131 $\pm$ 0.001     | < 1 x 10 <sup>-5</sup>          | < 1 x 10 <sup>-5</sup>             |
| Scaled $\pi$ (NOR)        | 0.261 $\pm$ 0.025      | 0.136 $\pm$ 0.011      | 0.073 $\pm$ 0.001     | < 1 x 10 <sup>-5</sup>          | < 1 x 10 <sup>-5</sup>             |
| Scaled $\pi$ (UTA)        | 0.374 $\pm$ 0.028      | 0.252 $\pm$ 0.016      | 0.126 $\pm$ 0.001     | < 1 x 10 <sup>-5</sup>          | < 1 x 10 <sup>-5</sup>             |
| Scaled $\pi$ (WES)        | 0.285 $\pm$ 0.022      | 0.189 $\pm$ 0.015      | 0.09 $\pm$ 0.001      | < 1 x 10 <sup>-5</sup>          | < 1 x 10 <sup>-5</sup>             |
| Tajima's <i>D</i> (COL)   | -0.586 $\pm$ 0.079     | -0.835 $\pm$ 0.071     | -0.987 $\pm$ 0.007    | < 1 x 10 <sup>-5</sup>          | 0.0685                             |
| Tajima's <i>D</i> (NOR)   | 0.052 $\pm$ 0.107      | -0.245 $\pm$ 0.144     | -0.456 $\pm$ 0.013    | < 1 x 10 <sup>-5</sup>          | 0.1652                             |
| Tajima's <i>D</i> (UTA)   | -0.447 $\pm$ 0.076     | -0.642 $\pm$ 0.076     | -1.2 $\pm$ 0.009      | < 1 x 10 <sup>-5</sup>          | < 1 x 10 <sup>-5</sup>             |
| Tajima's <i>D</i> (WES)   | -0.05 $\pm$ 0.082      | -0.285 $\pm$ 0.085     | -0.835 $\pm$ 0.009    | < 1 x 10 <sup>-5</sup>          | < 1 x 10 <sup>-5</sup>             |
| Fay & Wu's <i>H</i> (COL) | -0.207 $\pm$ 0.029     | -0.226 $\pm$ 0.032     | -0.15 $\pm$ 0.003     | 0.0234                          | 0.014                              |
| Fay & Wu's <i>H</i> (NOR) | -0.539 $\pm$ 0.062     | -0.622 $\pm$ 0.088     | -0.635 $\pm$ 0.007    | 0.128                           | 0.8704                             |



|                        |                    |                    |                   |                        |                        |
|------------------------|--------------------|--------------------|-------------------|------------------------|------------------------|
| Fay & Wu's $H$ (UTA)   | -0.221 ± 0.032     | -0.269 ± 0.039     | -0.276 ± 0.004    | 0.1098                 | 0.8611                 |
| Fay & Wu's $H$ (WES)   | -0.499 ± 0.045     | -0.626 ± 0.054     | -0.912 ± 0.006    | < 1 x 10 <sup>-5</sup> | < 1 x 10 <sup>-5</sup> |
| Gene density           | 4195.617 ± 271.134 | 4178.185 ± 334.597 | 4560.753 ± 35.436 | 0.2531                 | 0.3319                 |
| $d_{XY}$ (COL vs. NOR) | 3.953 ± 0.232      | 2.467 ± 0.163      | 1.472 ± 0.009     | < 1 x 10 <sup>-5</sup> | < 1 x 10 <sup>-5</sup> |
| $d_{XY}$ (COL vs. UTA) | 4.419 ± 0.271      | 2.692 ± 0.149      | 1.622 ± 0.01      | < 1 x 10 <sup>-5</sup> | < 1 x 10 <sup>-5</sup> |
| $d_{XY}$ (UTA vs. NOR) | 4.332 ± 0.271      | 2.568 ± 0.187      | 1.338 ± 0.009     | < 1 x 10 <sup>-5</sup> | < 1 x 10 <sup>-5</sup> |
| $d_{XY}$ (WES vs. COL) | 4.71 ± 0.285       | 2.914 ± 0.119      | 2.31 ± 0.013      | < 1 x 10 <sup>-5</sup> | 7 x 10 <sup>-4</sup>   |
| $d_{XY}$ (WES vs. NOR) | 4.531 ± 0.267      | 2.828 ± 0.151      | 2.125 ± 0.012     | < 1 x 10 <sup>-5</sup> | 2 x 10 <sup>-4</sup>   |
| $d_{XY}$ (WES vs. UTA) | 5.36 ± 0.316       | 3.242 ± 0.144      | 2.537 ± 0.014     | < 1 x 10 <sup>-5</sup> | 0.0012                 |
| RND (COL vs. NOR)      | 0.285 ± 0.02       | 0.162 ± 0.014      | 0.106 ± 0.001     | < 1 x 10 <sup>-5</sup> | < 1 x 10 <sup>-5</sup> |
| RND (COL vs. UTA)      | 0.299 ± 0.02       | 0.17 ± 0.011       | 0.114 ± 0.001     | < 1 x 10 <sup>-5</sup> | < 1 x 10 <sup>-5</sup> |
| RND (UTA vs. NOR)      | 0.302 ± 0.022      | 0.166 ± 0.015      | 0.094 ± 0.001     | < 1 x 10 <sup>-5</sup> | < 1 x 10 <sup>-5</sup> |
| RND (WES vs. COL)      | 0.328 ± 0.022      | 0.186 ± 0.01       | 0.166 ± 0.001     | < 1 x 10 <sup>-5</sup> | 0.1163                 |
| RND (WES vs. NOR)      | 0.326 ± 0.023      | 0.183 ± 0.015      | 0.155 ± 0.001     | < 1 x 10 <sup>-5</sup> | 0.0282                 |
| RND (WES vs. UTA)      | 0.364 ± 0.024      | 0.203 ± 0.011      | 0.178 ± 0.001     | < 1 x 10 <sup>-5</sup> | 0.0758                 |
| $F_{ST}$ (COL vs. NOR) | 0.171 ± 0.013      | 0.201 ± 0.02       | 0.223 ± 0.001     | 1 x 10 <sup>-4</sup>   | 0.2537                 |
| $F_{ST}$ (COL vs. UTA) | 0.078 ± 0.006      | 0.087 ± 0.01       | 0.138 ± 0.001     | < 1 x 10 <sup>-5</sup> | 2 x 10 <sup>-4</sup>   |
| $F_{ST}$ (UTA vs. NOR) | 0.134 ± 0.009      | 0.147 ± 0.015      | 0.169 ± 0.001     | 0.0049                 | 0.2163                 |
| $F_{ST}$ (WES vs. COL) | 0.243 ± 0.013      | 0.27 ± 0.018       | 0.445 ± 0.002     | < 1 x 10 <sup>-5</sup> | < 1 x 10 <sup>-5</sup> |
| $F_{ST}$ (WES vs. NOR) | 0.298 ± 0.018      | 0.347 ± 0.025      | 0.566 ± 0.002     | < 1 x 10 <sup>-5</sup> | < 1 x 10 <sup>-5</sup> |
| $F_{ST}$ (WES vs. UTA) | 0.237 ± 0.015      | 0.261 ± 0.018      | 0.504 ± 0.002     | < 1 x 10 <sup>-5</sup> | < 1 x 10 <sup>-5</sup> |
| <b>LG7p</b>            |                    |                    |                   |                        |                        |
| $\pi$ (COL)            | 4.54 ± 0.258       | 3.072 ± 0.117      | 1.743 ± 0.011     | < 1 x 10 <sup>-5</sup> | < 1 x 10 <sup>-5</sup> |
| $\pi$ (NOR)            | 3.064 ± 0.193      | 1.998 ± 0.092      | 0.965 ± 0.008     | < 1 x 10 <sup>-5</sup> | < 1 x 10 <sup>-5</sup> |
| $\pi$ (UTA)            | 5.423 ± 0.298      | 3.637 ± 0.135      | 1.707 ± 0.013     | < 1 x 10 <sup>-5</sup> | < 1 x 10 <sup>-5</sup> |
| $\pi$ (WES)            | 4.194 ± 0.202      | 2.637 ± 0.1        | 1.185 ± 0.009     | < 1 x 10 <sup>-5</sup> | < 1 x 10 <sup>-5</sup> |
| Scaled $\pi$ (COL)     | 0.359 ± 0.029      | 0.231 ± 0.012      | 0.131 ± 0.001     | < 1 x 10 <sup>-5</sup> | < 1 x 10 <sup>-5</sup> |
| Scaled $\pi$ (NOR)     | 0.243 ± 0.021      | 0.149 ± 0.008      | 0.073 ± 0.001     | < 1 x 10 <sup>-5</sup> | < 1 x 10 <sup>-5</sup> |
| Scaled $\pi$ (UTA)     | 0.407 ± 0.029      | 0.266 ± 0.014      | 0.126 ± 0.001     | < 1 x 10 <sup>-5</sup> | < 1 x 10 <sup>-5</sup> |
| Scaled $\pi$ (WES)     | 0.328 ± 0.023      | 0.188 ± 0.011      | 0.09 ± 0.001      | < 1 x 10 <sup>-5</sup> | < 1 x 10 <sup>-5</sup> |
| Tajima's $D$ (COL)     | -0.619 ± 0.066     | -0.878 ± 0.059     | -0.987 ± 0.007    | < 1 x 10 <sup>-5</sup> | 0.0831                 |
| Tajima's $D$ (NOR)     | 0.135 ± 0.093      | -0.117 ± 0.1       | -0.456 ± 0.013    | < 1 x 10 <sup>-5</sup> | 0.0014                 |
| Tajima's $D$ (UTA)     | -0.48 ± 0.066      | -0.741 ± 0.062     | -1.2 ± 0.009      | < 1 x 10 <sup>-5</sup> | < 1 x 10 <sup>-5</sup> |
| Tajima's $D$ (WES)     | 0.106 ± 0.068      | -0.141 ± 0.084     | -0.835 ± 0.009    | < 1 x 10 <sup>-5</sup> | < 1 x 10 <sup>-5</sup> |
| Fay & Wu's $H$ (COL)   | -0.157 ± 0.022     | -0.199 ± 0.026     | -0.15 ± 0.003     | 0.7006                 | 0.0292                 |
| Fay & Wu's $H$ (NOR)   | -0.532 ± 0.055     | -0.614 ± 0.066     | -0.635 ± 0.007    | 0.0425                 | 0.7098                 |
| Fay & Wu's $H$ (UTA)   | -0.194 ± 0.03      | -0.257 ± 0.038     | -0.276 ± 0.004    | 0.0032                 | 0.5596                 |
| Fay & Wu's $H$ (WES)   | -0.375 ± 0.04      | -0.471 ± 0.052     | -0.912 ± 0.006    | < 1 x 10 <sup>-5</sup> | < 1 x 10 <sup>-5</sup> |
| Gene density           | 3730.91 ± 189.84   | 3396.622 ± 219.057 | 4560.753 ± 35.436 | 0.0016                 | < 1 x 10 <sup>-5</sup> |
| $d_{XY}$ (COL vs. NOR) | 3.657 ± 0.171      | 2.524 ± 0.102      | 1.472 ± 0.009     | < 1 x 10 <sup>-5</sup> | < 1 x 10 <sup>-5</sup> |
| $d_{XY}$ (COL vs. UTA) | 4.24 ± 0.213       | 2.73 ± 0.103       | 1.622 ± 0.01      | < 1 x 10 <sup>-5</sup> | < 1 x 10 <sup>-5</sup> |
| $d_{XY}$ (UTA vs. NOR) | 4.019 ± 0.204      | 2.627 ± 0.109      | 1.338 ± 0.009     | < 1 x 10 <sup>-5</sup> | < 1 x 10 <sup>-5</sup> |
| $d_{XY}$ (WES vs. COL) | 4.48 ± 0.207       | 2.998 ± 0.105      | 2.31 ± 0.013      | < 1 x 10 <sup>-5</sup> | < 1 x 10 <sup>-5</sup> |
| $d_{XY}$ (WES vs. NOR) | 4.286 ± 0.206      | 2.92 ± 0.114       | 2.125 ± 0.012     | < 1 x 10 <sup>-5</sup> | < 1 x 10 <sup>-5</sup> |
| $d_{XY}$ (WES vs. UTA) | 4.988 ± 0.215      | 3.338 ± 0.119      | 2.537 ± 0.014     | < 1 x 10 <sup>-5</sup> | < 1 x 10 <sup>-5</sup> |
| RND (COL vs. NOR)      | 0.272 ± 0.016      | 0.174 ± 0.01       | 0.106 ± 0.001     | < 1 x 10 <sup>-5</sup> | < 1 x 10 <sup>-5</sup> |
| RND (COL vs. UTA)      | 0.307 ± 0.018      | 0.184 ± 0.01       | 0.114 ± 0.001     | < 1 x 10 <sup>-5</sup> | < 1 x 10 <sup>-5</sup> |
| RND (UTA vs. NOR)      | 0.286 ± 0.017      | 0.177 ± 0.01       | 0.094 ± 0.001     | < 1 x 10 <sup>-5</sup> | < 1 x 10 <sup>-5</sup> |
| RND (WES vs. COL)      | 0.329 ± 0.018      | 0.202 ± 0.01       | 0.166 ± 0.001     | < 1 x 10 <sup>-5</sup> | 8 x 10 <sup>-4</sup>   |
| RND (WES vs. NOR)      | 0.31 ± 0.017       | 0.199 ± 0.011      | 0.155 ± 0.001     | < 1 x 10 <sup>-5</sup> | < 1 x 10 <sup>-5</sup> |
| RND (WES vs. UTA)      | 0.356 ± 0.019      | 0.223 ± 0.012      | 0.178 ± 0.001     | < 1 x 10 <sup>-5</sup> | 4 x 10 <sup>-4</sup>   |
| $F_{ST}$ (COL vs. NOR) | 0.192 ± 0.009      | 0.215 ± 0.012      | 0.223 ± 0.001     | 0.0028                 | 0.5865                 |
| $F_{ST}$ (COL vs. UTA) | 0.08 ± 0.004       | 0.084 ± 0.004      | 0.138 ± 0.001     | < 1 x 10 <sup>-5</sup> | < 1 x 10 <sup>-5</sup> |
| $F_{ST}$ (UTA vs. NOR) | 0.15 ± 0.007       | 0.163 ± 0.01       | 0.169 ± 0.001     | 0.0402                 | 0.6099                 |

|                        |                   |                   |                   |                      |                      |
|------------------------|-------------------|-------------------|-------------------|----------------------|----------------------|
| $F_{ST}$ (WES vs. COL) | $0.218 \pm 0.012$ | $0.236 \pm 0.015$ | $0.445 \pm 0.002$ | $< 1 \times 10^{-5}$ | $< 1 \times 10^{-5}$ |
| $F_{ST}$ (WES vs. NOR) | $0.304 \pm 0.012$ | $0.331 \pm 0.014$ | $0.566 \pm 0.002$ | $< 1 \times 10^{-5}$ | $< 1 \times 10^{-5}$ |
| $F_{ST}$ (WES vs. UTA) | $0.207 \pm 0.01$  | $0.234 \pm 0.014$ | $0.504 \pm 0.002$ | $< 1 \times 10^{-5}$ | $< 1 \times 10^{-5}$ |

<sup>a</sup> $d_{XY}$  and  $\pi$  are in unit of  $10^{-3}$ , and gene density is total length of coding regions (bp) per 20-kb window.

**Table S10** ANOVA (offset from reference group) test of recombination rate between BLS regions and background

| Source      | df   | <i>F</i> | <i>P</i> |
|-------------|------|----------|----------|
| <b>WES</b>  |      |          |          |
| Model       | 3    | 1.0331   | 0.3766   |
| Error       | 7221 |          |          |
| C. Total    | 7224 |          |          |
| <b>NOR</b>  |      |          |          |
| Model       | 3    | 2.4242   | 0.0638   |
| Error       | 6676 |          |          |
| C. Total    | 6679 |          |          |
| <b>UTA</b>  |      |          |          |
| Model       | 3    | 5.7599   | 0.0006   |
| Error       | 7198 |          |          |
| C. Total    | 7201 |          |          |
| <b>COL</b>  |      |          |          |
| Model       | 3    | 34.7665  | <0.0001  |
| Error       | 7287 |          |          |
| C. Total    | 7290 |          |          |
| <b>COL1</b> |      |          |          |
| Model       | 3    | 2.2534   | 0.080    |
| Error       | 7233 |          |          |
| C. Total    | 7236 |          |          |
| <b>COL2</b> |      |          |          |
| Model       | 3    | 53.7963  | <0.0001  |
| Error       | 7282 |          |          |
| C. Total    | 7285 |          |          |

note: in each model, background was used as reference group.

**Table S11** ANOVA test of scaled diversity ( $\pi$ ) BLS regions and background by controlling recombination rate (recombination) and gene density (gene\_density).

| Group | Region | Source        | df   | <i>F</i> | <i>P</i> |
|-------|--------|---------------|------|----------|----------|
| UTA   | LG1    | region        | 1    | 1180.69  | <2e-16   |
|       |        | recombination | 1    | 171.65   | <2e-16   |
|       |        | gene_density  | 1    | 69.24    | <2e-16   |
|       |        | Residuals     | 6909 |          |          |
|       | LG5    | region        | 1    | 377.11   | <2e-16   |
|       |        | recombination | 1    | 81.94    | <2e-16   |
|       |        | gene_density  | 1    | 121.45   | <2e-16   |
|       |        | Residuals     | 6733 |          |          |
|       | LG7    | region        | 1    | 715.1    | <2e-16   |
|       |        | recombination | 1    | 79.46    | <2e-16   |
|       |        | gene_density  | 1    | 94.68    | <2e-16   |
|       |        | Residuals     | 6783 |          |          |
| WES   | LG1    | region        | 1    | 1525.9   | <2e-16   |
|       |        | recombination | 1    | 682      | <2e-16   |
|       |        | gene_density  | 1    | 7.25     | 0.00711  |
|       |        | Residuals     | 6931 |          |          |
|       | LG5    | region        | 1    | 427.6    | <2e-16   |
|       |        | recombination | 1    | 574.3    | <2e-16   |
|       |        | gene_density  | 1    | 20.7     | 5.45E-06 |
|       |        | Residuals     | 6755 |          |          |
|       | LG7    | region        | 1    | 928.16   | <2e-16   |
|       |        | recombination | 1    | 420.06   | <2e-16   |
|       |        | gene_density  | 1    | 12.25    | 0.000469 |
|       |        | Residuals     | 6804 |          |          |
| COL   | LG1    | region        | 1    | 1145.7   | <2e-16   |
|       |        | recombination | 1    | 330.48   | <2e-16   |
|       |        | gene_density  | 1    | 45.17    | 1.94E-11 |
|       |        | Residuals     | 6998 |          |          |
|       | LG5    | region        | 1    | 307.12   | <2e-16   |
|       |        | recombination | 1    | 227.64   | <2e-16   |
|       |        | gene_density  | 1    | 86.59    | <2e-16   |
|       |        | Residuals     | 6821 |          |          |
|       | LG7    | region        | 1    | 593.89   | <2e-16   |
|       |        | recombination | 1    | 296.03   | <2e-16   |
|       |        | gene_density  | 1    | 64.43    | 1.17E-15 |
|       |        | Residuals     | 6871 |          |          |
| NOR   | LG1    | region        | 1    | 1267.127 | <2e-16   |
|       |        | recombination | 1    | 117.549  | <2e-16   |
|       |        | gene_density  | 1    | 5.036    | 0.0249   |
|       |        | Residuals     | 6393 |          |          |
|       | LG5    | region        | 1    | 404.72   | <2e-16   |
|       |        | recombination | 1    | 58.59    | 2.24E-14 |
|       |        | gene_density  | 1    | 28.88    | 7.98E-08 |
|       |        | Residuals     | 6217 |          |          |
|       | LG7    | region        | 1    | 485.01   | <2e-16   |
|       |        | recombination | 1    | 69.88    | <2e-16   |
|       |        | gene_density  | 1    | 20.26    | 6.88E-06 |
|       |        | Residuals     | 6264 |          |          |

**Table S12** Number and size of  $F_{ST}$ -islands in each *B. stricta* group pairs.

| Group Pairs | No. of 20-kb outliers | No. of combined outliers* | Mean size (kb)* | Max size (kb)* |
|-------------|-----------------------|---------------------------|-----------------|----------------|
| WES vs. COL | 163                   | 125                       | 26.1            | 100            |
| WES vs. NOR | 22                    | 19                        | 23.2            | 40             |
| WES vs. UTA | 85                    | 72                        | 23.6            | 60             |
| COL vs. NOR | 306                   | 225                       | 27.2            | 120            |
| COL vs. UTA | 349                   | 249                       | 28              | 140            |
| UTA vs. NOR | 352                   | 239                       | 29.5            | 140            |

\*adjacent outliers were jonted into single combined outliers

**Table S13** ANOVA test of  $F_{ST}$  between  $F_{ST}$ -islands and genomic background by controlling for recombination rate (rec1 and rec2) and gene density (gene\_density).

| Source             | df   | <i>F</i> | <i>P</i> |
|--------------------|------|----------|----------|
| <b>WES vs. COL</b> |      |          |          |
| region             | 1    | 977.25   | 2.00E-16 |
| rec1               | 1    | 99.95    | 2.00E-16 |
| rec2               | 1    | 83.05    | 2.00E-16 |
| gene_density       | 1    | 59.1     | 1.71E-14 |
| Residuals          | 6786 |          |          |
| <b>WES vs. NOR</b> |      |          |          |
| region             | 1    | 86.426   | 2.00E-16 |
| rec1               | 1    | 133.261  | 2.00E-16 |
| rec2               | 1    | 4.157    | 0.0415   |
| gene_density       | 1    | 65.28    | 7.76E-16 |
| Residuals          | 6126 |          |          |
| <b>WES vs. UTA</b> |      |          |          |
| region             | 1    | 402.592  | 2.00E-16 |
| rec1               | 1    | 127.545  | 2.00E-16 |
| rec2               | 1    | 0.436    | 0.509    |
| gene_density       | 1    | 64.943   | 9.06E-16 |
| Residuals          | 6710 |          |          |
| <b>COL vs. NOR</b> |      |          |          |
| region             | 1    | 3624.895 | 2.00E-16 |
| rec1               | 1    | 0.326    | 0.56833  |
| rec2               | 1    | 8.215    | 0.00417  |
| gene_density       | 1    | 25.484   | 4.59E-07 |
| Residuals          | 6194 |          |          |
| <b>COL vs. UTA</b> |      |          |          |
| region             | 1    | 5123.269 | 2.00E-16 |
| rec1               | 1    | 10.267   | 0.00136  |
| rec2               | 1    | 0.112    | 0.737524 |
| gene_density       | 1    | 14.02    | 0.000182 |
| Residuals          | 6820 |          |          |
| <b>UTA vs. NOR</b> |      |          |          |
| region             | 1    | 4511.748 | 2.00E-16 |
| rec1               | 1    | 27.274   | 1.82E-07 |
| rec2               | 1    | 0.183    | 0.669    |
| gene_density       | 1    | 0.368    | 0.544    |
| Residuals          | 6136 |          |          |

**Table S14** GO categories overrepresented for genes located in  $F_{ST}$ -islands

| GO term            | Ontology | Description                                      | <i>P</i> -value | FDR    |
|--------------------|----------|--------------------------------------------------|-----------------|--------|
| <b>COL vs. NOR</b> |          |                                                  |                 |        |
| GO:0005986         | P        | sucrose biosynthetic process                     | 4.30E-05        | 0.028  |
| GO:0046351         | P        | disaccharide biosynthetic process                | 9.40E-05        | 0.031  |
| GO:0009312         | P        | oligosaccharide biosynthetic process             | 0.00022         | 0.047  |
| GO:0050897         | F        | cobalt ion binding                               | 4.10E-05        | 0.0088 |
| GO:0016157         | F        | sucrose synthase activity                        | 0.00021         | 0.023  |
| GO:0015114         | F        | phosphate ion transmembrane transporter activity | 0.00058         | 0.041  |
| <b>COL vs. WES</b> |          |                                                  |                 |        |
| GO:0008187         | F        | poly-pyrimidine tract binding                    | 0.00016         | 0.012  |
| GO:0008266         | F        | poly(U) RNA binding                              | 0.00011         | 0.012  |
| <b>WES vs. UTA</b> |          |                                                  |                 |        |
| GO:0071705         | P        | nitrogen compound transport                      | 1.60E-05        | 0.0048 |

NOTE, No GO categories were over-represented for genes located in islands of the other three comparisons, COL vs. UTA, WES vs. NOR and UTA vs. NOR.

**Table S15** Error rate as a function of sequencing depth based on reads from accessions LTM and SAD12.

| SampleID | Depth | TP      | FHET  | FHOM  | MISS    | TPR (%) | MR (%)  | FR (%) |
|----------|-------|---------|-------|-------|---------|---------|---------|--------|
| LTM      | 1     | 909674  | 60    | 825   | 3214837 | 99.9028 | 77.9280 | 0.0972 |
| LTM      | 2     | 1617664 | 246   | 850   | 2506635 | 99.9323 | 60.7611 | 0.0677 |
| LTM      | 2.5   | 2030457 | 582   | 694   | 2093662 | 99.9372 | 50.7506 | 0.0628 |
| LTM      | 5     | 3564980 | 7925  | 157   | 552332  | 99.7738 | 13.3886 | 0.2262 |
| LTM      | 10    | 3984018 | 16271 | 39    | 125067  | 99.5923 | 3.0316  | 0.4077 |
| LTM      | 15    | 4044281 | 18279 | 30    | 62805   | 99.5493 | 1.5224  | 0.4507 |
| LTM      | 40    | 4080454 | 20007 | 18    | 24916   | 99.5116 | 0.6040  | 0.4884 |
| SAD12    | 1     | 1036588 | 1     | 13150 | 3075657 | 98.7472 | 74.5542 | 1.2528 |
| SAD12    | 2     | 1818442 | 8     | 19683 | 2287262 | 98.9287 | 55.4435 | 1.0713 |
| SAD12    | 2.5   | 2256940 | 38    | 22182 | 1846235 | 99.0251 | 44.7529 | 0.9749 |
| SAD12    | 5     | 3736172 | 744   | 22444 | 366035  | 99.3832 | 8.8727  | 0.6168 |
| SAD12    | 10    | 4035425 | 2766  | 14805 | 72399   | 99.5665 | 1.7550  | 0.4335 |
| SAD12    | 15    | 4070682 | 3293  | 10466 | 40955   | 99.6631 | 0.9928  | 0.3369 |
| SAD12    | 40    | 4098076 | 2807  | 4222  | 20290   | 99.8288 | 0.4918  | 0.1712 |

TP, True positive; FHET, false heterozygote; FHOM, false homozygote; MISS, missing loci.

TPR, true positive rate, defined as  $TP/(TP + FHET + FHOM)$ ,

FR, false discovery rate, defined as  $(FHET + FHOM)/(TP + FHET + FHOM)$

MR, missing rate, defined as  $MISS/(TP + FHET + FHOM + MISS)$
